1 **Expression of extracellular multiheme cytochromes discovered in a**  
2 **betaproteobacterium during Mn(III) reduction**

3 Nadia Szeinbaum<sup>1,2,5\*</sup>, Brook L. Nunn<sup>3</sup>, Amanda R. Cavazos<sup>2</sup>, Sean A. Crowe<sup>3</sup>, Frank J.  
4 Stewart<sup>1</sup>, Thomas J. DiChristina<sup>1</sup>, Christopher T. Reinhard<sup>2,5</sup>, and Jennifer B. Glass<sup>2,5\*</sup>

5  
6 <sup>1</sup>School of Biological Sciences, Georgia Institute of Technology, Atlanta, GA, USA

7 <sup>2</sup>School of Earth and Atmospheric Sciences, Georgia Institute of Technology, Atlanta, GA, USA

8 <sup>3</sup>Department of Genome Sciences, University of Washington, Seattle, WA, USA

9 <sup>4</sup>Department of Microbiology & Immunology and Department of Earth, Ocean, & Atmospheric  
10 Sciences, University of British Columbia, Vancouver, Canada

11 <sup>5</sup>NASA Astrobiology Institute, Alternative Earths Team, Mountain View, CA

12

13 \*Corresponding author: [jennifer.glass@eas.gatech.edu](mailto:jennifer.glass@eas.gatech.edu)

14 **Running title:** Novel undecaheme in Betaproteobacteria

15

16 **Abstract:** Soluble ligand-bound Mn(III) can support anaerobic microbial respiration in diverse  
17 aquatic environments. Thus far, Mn(III) reduction has only been associated with certain  
18 *Gammaproteobacteria*. Here, we characterized microbial communities enriched from Mn-replete  
19 sediments of Lake Matano, Indonesia. Our results provide the first evidence for biological  
20 reduction of soluble Mn(III) outside of the *Gammaproteobacteria*. Metagenome assembly and  
21 binning revealed a novel betaproteobacterium, which we designate “*Candidatus* Dechloromonas  
22 occultata.” This organism dominated the enrichment and expressed a novel cytochrome c-rich  
23 protein cluster (Occ), including an undecaheme putatively involved in extracellular electron  
24 transfer during Mn(III) reduction. The *occ* gene cluster was detected in diverse aquatic bacteria,  
25 including uncultivated *Betaproteobacteria* from the deep subsurface. These observations provide  
26 new insight into the taxonomic and functional diversity of microbially-driven Mn(III) reduction  
27 in natural environments.

28  
29 **Main text:** Manganese(III) is the most recently discovered player in the manganese cycle (10).  
30 Ligand-bound Mn(III) is often the most abundant Mn species in aquatic ecosystems (18), yet  
31 knowledge about microbes cycling Mn(III) remains fragmentary. To date, only *Shewanella* spp.  
32 (*Gammaproteobacteria*) are known to respire soluble Mn(III) using the Mtr pathway (17, 22,  
33 23). The Mtr pathway forms a porin-cytochrome (PCC) conduit that transports electrons across  
34 the periplasm (11) for extracellular respiration of Mn(III/IV), Fe(III), and other metals (20, 23).  
35 Another PCC is Mto used by freshwater *Betaproteobacteria* for extracellular Fe(II) oxidation (7,  
36 12, 16). Environmental omics suggests that metal reduction by *Betaproteobacteria* may be  
37 widespread in the deep subsurface (1, 13). However, only a few Fe(III)-reducing  
38 *Betaproteobacteria* isolates have been characterized (5, 8). This study presents the first evidence

39 for biological reduction of soluble Mn(III) by a bacterium outside of the *Gammaproteobacteria*  
40 class.

41 We explored microbial Mn(III) reduction in enrichments inoculated with sediment from  
42 Lake Matano, Indonesia, which has active microbial Mn and methane (CH<sub>4</sub>) cycles (15).  
43 Manganese reduction coupled to CH<sub>4</sub> oxidation is a thermodynamically favorable metabolism,  
44 and its natural occurrence is supported by biological evidence (2) and geochemical evidence (4,  
45 19). We designed an enrichment strategy to select for microbes capable of anaerobic CH<sub>4</sub>  
46 oxidation coupled to soluble Mn(III) reduction incubating anoxic Lake Matano with soluble  
47 Mn(III)-pyrophosphate as the electron acceptor (with 2% O<sub>2</sub> in a subset of bottles), and CH<sub>4</sub> as  
48 the sole electron donor and carbon source (see **Supplemental Material** for enrichment details).  
49 Cultures were transferred into fresh media after Mn(III) was completely reduced to Mn(II) for a  
50 total of five transfers over 395 days. By the fourth transfer, cultures with CH<sub>4</sub> headspace (with or  
51 without 2% O<sub>2</sub>) reduced ~80% of soluble Mn(III) compared to ~30% with N<sub>2</sub> headspace (**Fig. 1**).  
52 16S rRNA gene sequences were dominated by *Betaproteobacteria* (*Rhodocyclales*) and  
53 *Deltaproteobacteria* (*Desulfuromonadales*), and <sup>13</sup>CH<sub>4</sub> oxidation to <sup>13</sup>CO<sub>2</sub> was undetectable  
54 (**Figs. S1, S2**).

55 Samples for metagenomic and metaproteomic analysis were harvested from the fifth  
56 transfer (**Fig. 1; Fig. S1**). Out of 2,952 proteins identified in the proteome, 90% were assigned to  
57 *Betaproteobacteria*; of those, 72% mapped to a 99.53% metagenome-assembled genome (MAG;  
58 *Rhodocyclales* bacterium GT-UBC; NCBI accession QXPY01000000) with 81-82% average  
59 nucleotide identity (ANI) and phylogenetic affiliation to *Dechloromonas* spp. (**Table S1; Fig.**  
60 **S3**). This MAG is named here “*Candidatus Dechloromonas occultata*” sp. nov.; etymology:  
61 *occultata*; (L. fem. adj. ‘hidden’). The remaining 10% of proteins mapped to

62 *Deltaproteobacteria*; of those, 70% mapped to a nearly complete MAG (*Desulfuromonadales*  
63 bacterium GT-UBC; NCBI accession RHLS01000000) with 80% ANI to *Geobacter*  
64 *sulfurreducens*. This MAG is named here “*Candidatus Geobacter occultata*”.

65         Cytochromes containing multiple *c*-type hemes are key for electron transport during  
66 microbial metal transformations, and therefore might also be expected to play a role in Mn(III)  
67 reduction. Numerous mono-, di-, and multi (>3)-heme cytochromes (MHCs) were expressed by  
68 “*Ca. D. occultata*” in Mn(III)-reducing cultures. Nine out of 15 MHCs encoded by the “*Ca. D.*  
69 *occultata*” MAG were expressed, including two decahemes similar to MtoA in Fe(II)-oxidizing  
70 *Betaproteobacteria* (**Tables 1, S2, S3; Figs. 2A, S4**). Several highly expressed MHCs were  
71 encoded on a previously unreported 19-gene cluster with 10 cytochrome-*c* proteins, hereafter  
72 *occA-S* (**Table 1; Figs. 2B, S5, S6**). OccP was an undecaheme, which are known to be involved  
73 in metal reduction (6, 21). “*Ca. Dechloromonas occultata*” may reduce Mn(III) using the novel  
74 extracellular undecaheme OccP as the terminal Mn(III) reductase, although the function of the  
75 putative Occ complex has yet to be experimentally verified.

76         We investigated the taxonomic distribution of genes encoding *occP*, *mtoA*, and key  
77 denitrification complexes expressed by “*Ca. D. occultata*”. We discovered *occP* homologs (40-  
78 60% identity) in diverse *Betaproteobacteria* from diverse freshwaters and deep subsurface  
79 groundwaters, as well as several *Gammaproteobacteria* and one alphaproteobacterium (**Fig. 2D;**  
80 **Table S3**). Most *occP*-containing bacteria also possessed *mtoA* and denitrification (**Fig. 2D**)  
81 genes. For more discussion of denitrification, see **Supplemental Text** and **Figs. S7** and **S8**.

82         While the specific role of CH<sub>4</sub> in Mn(III) reduction remains unknown (see **Supplemental**  
83 **Text**), CH<sub>4</sub> significantly stimulated expression of many cytochrome *c* proteins, including  
84 OccABGJK, MtoD-2, and cytochrome-*c*4 and -*c*5 proteins associated with anaerobic respiration

85 (p < 0.05; **Table 1; Fig. 2C**). Methane also led to increased expression of several “*Ca. D.*  
86 *occultata*” proteins involved in outer membrane structure and composition, including an  
87 extracellular DUF4214 protein located next to an S-layer protein similar to those involved in  
88 manganese binding and deposition (24), a serine protease possibly involved in Fe(III) particle  
89 attachment (3), an extracellular PEP-CTERM sorting protein for protein export (9), and a Tol-Pal  
90 system for outer membrane integrity (**Table 1**). A type IV pilin protein (87% identity to  
91 *Geobacter pickeringii* (14)) was significantly more highly expressed with CH<sub>4</sub> vs. N<sub>2</sub> in the “*Ca.*  
92 *G. occultata*” proteome (p=0.02; **Table 1**). The possible involvement of *Geobacter* e-pilins in  
93 Mn(III) reduction remains an open question. For additional discussion of other features of “*Ca.*  
94 *D. occultata*” and “*Ca. G. occultata*” genomes and proteomes, see **Supplemental Text, Table**  
95 **S4**, Figs. **S9**, **S10**, and **S11**.

96  
97 **Acknowledgements.** This research was funded by NASA Exobiology grant NNX14AJ87G.  
98 Support was also provided by a Center for Dark Energy Biosphere Investigations (NSF-CDEBI  
99 OCE-0939564) small research grant and supported by the NASA Astrobiology Institute  
100 (NNA15BB03A) and a NASA Astrobiology Postdoctoral Fellowship to NS. SAC was supported  
101 through NSERC CRC, CFI, and Discovery grants. We thank Marcus Bray, Andrew Burns, Caleb  
102 Easterly, Pratik Jagtap, Cory Padilla, Angela Peña, Johnny Striepen, and Rowan Wolschleger for  
103 technical assistance. We thank Emily Weinert for helpful discussions.

104

105 **Competing Interests:** The authors declare no competing interests.

106

## 107 **References**

- 108 1 Anantharaman K, Brown CT, Hug LA, Sharon I, Castelle CJ, Probst AJ *et al* (2016). Thousands  
109 of microbial genomes shed light on interconnected biogeochemical processes in an aquifer system. *Nat*  
110 *Commun* **7**: 13219.
- 111 2 Beal EJ, House CH, Orphan VJ (2009). Manganese- and iron-dependent marine methane  
112 oxidation. *Science* **325**: 184-187.
- 113 3 Burns JL, Ginn BR, Bates DJ, Dublin SN, Taylor JV, Apkarian RP *et al* (2009). Outer  
114 membrane-associated serine protease involved in adhesion of *Shewanella oneidensis* to Fe (III) oxides.  
115 *Environmental science & technology* **44**: 68-73.
- 116 4 Crowe SA, Katsev S, Leslie K, Sturm A, Magen C, Nomosatryo S *et al* (2011). The methane  
117 cycle in ferruginous Lake Matano. *Geobiology* **9**: 61-78.
- 118 5 Cummings DE, Caccavo F, Spring S, Rosenzweig RF (1999). *Ferribacterium limneticum*, gen.  
119 nov., sp. nov., an Fe(III)-reducing microorganism isolated from mining-impacted freshwater lake  
120 sediments. *Archives of Microbiology* **171**: 183-188.
- 121 6 Edwards MJ, Hall A, Shi L, Fredrickson JK, Zachara JM, Butt JN *et al* (2012). The crystal  
122 structure of the extracellular 11-heme cytochrome UndA reveals a conserved 10-heme motif and defined  
123 binding site for soluble iron chelates. *Structure* **20**: 1275-1284.
- 124 7 Emerson D, Field EK, Chertkov O, Davenport KW, Goodwin L, Munk C *et al* (2013).  
125 Comparative genomics of freshwater Fe-oxidizing bacteria: implications for physiology, ecology, and  
126 systematics. *Front Microbiol* **4**: 254.
- 127 8 Finneran KT, Johnsen CV, Lovley DR (2003). *Rhodoferrax ferrireducens* sp. nov., a  
128 psychrotolerant, facultatively anaerobic bacterium that oxidizes acetate with the reduction of Fe(III).  
129 *International Journal of Systematic and Evolutionary Microbiology* **53**: 669-673.
- 130 9 Haft DH, Paulsen IT, Ward N, Selengut JD (2006). Exopolysaccharide-associated protein sorting  
131 in environmental organisms: the PEP-CTERM/EpsH system. Application of a novel phylogenetic  
132 profiling heuristic. *BMC Biol* **4**: 29.
- 133 10 Hansel C (2017). Small but mighty: how minor components drive major biogeochemical cycles.  
134 *Environmental microbiology reports* **9**: 8-10.
- 135 11 Hartshorne RS, Reardon CL, Ross D, Nuester J, Clarke TA, Gates AJ *et al* (2009).  
136 Characterization of an electron conduit between bacteria and the extracellular environment. *Proc Natl*  
137 *Acad Sci U S A* **106**: 22169-22174.
- 138 12 He S, Barco RA, Emerson D, Roden EE (2017). Comparative Genomic Analysis of Neutrophilic  
139 Iron (II) Oxidizer Genomes for Candidate Genes in Extracellular Electron Transfer. *Frontiers in*  
140 *Microbiology* **8**: 1584.
- 141 13 Hermsdorf AW, Amano Y, Miyakawa K, Ise K, Suzuki Y, Anantharaman K *et al* (2017).  
142 Potential for microbial H<sub>2</sub> and metal transformations associated with novel bacteria and archaea in deep  
143 terrestrial subsurface sediments. *The ISME Journal* **11**: 1915.
- 144 14 Holmes DE, Dang Y, Walker DJ, Lovley DR (2016). The electrically conductive pili of  
145 *Geobacter* species are a recently evolved feature for extracellular electron transfer. *Microbial Genomics* **2**.

- 146 15 Jones C, Crowe SA, Sturm A, Leslie KL, MacLean LCW, Katsev S *et al* (2011).  
147 Biogeochemistry of manganese in ferruginous Lake Matano, Indonesia. *Biogeosciences* **8**: 2977-2991.
- 148 16 Kato S, Ohkuma M, Powell DH, Krepski ST, Oshima K, Hattori M *et al* (2015). Comparative  
149 genomic insights into ecophysiology of neutrophilic, microaerophilic iron oxidizing bacteria. *Frontiers in*  
150 *Microbiology* **6**: 1265.
- 151 17 Kostka JE, Luther III GW, Nealson KH (1995). Chemical and biological reduction of Mn (III)-  
152 pyrophosphate complexes: potential importance of dissolved Mn (III) as an environmental oxidant.  
153 *Geochimica et Cosmochimica Acta* **59**: 885-894.
- 154 18 Oldham VE, Siebecker MG, Jones MR, Mucci A, Tebo BM, Luther GW (2019). The Speciation  
155 and Mobility of Mn and Fe in Estuarine Sediments. *Aquatic Geochemistry*.
- 156 19 Riedinger N, Formolo MJ, Lyons TW, Henkel S, Beck A, Kasten S (2014). An inorganic  
157 geochemical argument for coupled anaerobic oxidation of methane and iron reduction in marine  
158 sediments. *Geobiology* **12**: 172-181.
- 159 20 Shi L, Dong H, Reguera G, Beyenal H, Lu A, Liu J *et al* (2016). Extracellular electron transfer  
160 mechanisms between microorganisms and minerals. *Nature Reviews Microbiology* **14**: 651.
- 161 21 Smith JA, Lovley DR, Tremblay PL (2013). Outer cell surface components essential for Fe(III)  
162 oxide reduction by *Geobacter metallireducens*. *Appl Environ Microbiol* **79**: 901-907.
- 163 22 Szeinbaum N, Burns JL, DiChristina TJ (2014). Electron transport and protein secretion pathways  
164 involved in Mn (III) reduction by *Shewanella oneidensis*. *Environmental Microbiology Reports* **6**: 490-  
165 500.
- 166 23 Szeinbaum N, Lin H, Brandes JA, Taillefert M, Glass JB, DiChristina TJ (2017). Microbial  
167 manganese(III) reduction fuelled by anaerobic acetate oxidation. *Environ Microbiol* **19**: 3475-3486.
- 168 24 Wang X, Schröder HC, Schloßmacher U, Müller WE (2009). Organized bacterial assemblies in  
169 manganese nodules: evidence for a role of S-layers in metal deposition. *Geo-Marine Letters* **29**: 85-91.
- 170  
171

172 **Table and Figure Captions**

173

174

175 **Table 1. Expression levels for “*Ca. D. occultata*” proteins in the presence of CH<sub>4</sub> and N<sub>2</sub>.**

176 Peptide counts are normalized to total “*Ca. D. occultata*” proteins x 10,000. Blank cells indicate

177 proteins with <2 normalized peptide counts. Gray boxes indicate membrane proteins with that

178 may be underrepresented by mass spectrometry-based metaproteomic analyses, which inherently

179 favor soluble over insoluble membrane-bound or hydrophobic proteins. SP: signal peptide

180 (Y:present/N:absent); TMH: numbers of transmembrane helices; # CxxCH: number of heme-

181 binding motifs; P-sort: predicted cellular location. Bold proteins indicate proteins that were

182 significantly more expressed with CH<sub>4</sub> than N<sub>2</sub> (CH<sub>4</sub>/N<sub>2</sub>>1; p<0.05). MCP: methyl-accepting

183 chemotaxis protein; PPIase: Peptidyl-proline isomerase; P: periplasm, C: cytoplasm; OM: outer

184 membrane; IM: inner membrane, E: extracellular; U: unknown. MtoX and MtoY were predicted

185 to be an inner membrane cytochrome-b protein and a methyl-accepting chemotaxis protein,

186 respectively.

187

188 **Figure 1. Consumption of Mn(III) in Lake Matano enrichments in the presence and**

189 **absence of methane.** Sediment-free cultures (transfer 4) from 335 days after the initial

190 enrichment were incubated for 45 days with 1 mM Mn(III) pyrophosphate as the sole electron

191 acceptor. Initial bottle headspace contained 50% CH<sub>4</sub> + 50% N<sub>2</sub> (black circles), 50% CH<sub>4</sub>+48%

192 N<sub>2</sub>+2% O<sub>2</sub> (gray circles), 100% N<sub>2</sub> (white circles), and 50% CH<sub>4</sub>+50% N<sub>2</sub> heat killed controls

193 (black triangles). Error bars are standard deviations from duplicate experiments. Color change

194 from red to clear indicates Mn(III) reduction.

195



196 **Figure 2. Gene arrangement, predicted protein locations, and taxonomic distribution of**  
197 **major expressed respiratory complexes in “*Ca. D. occultata*”.** **A:** MtoDAB(Y)X porin-  
198 cytochrome c electron conduit; **B:** OccA-S; **C:** denitrification complexes (Nap, Nir, Nor and  
199 cNos); **D:** Occurrence of key marker genes in *Betaproteobacteria* and *Gammaproteobacteria*  
200 with >95% complete genomes that encode OccP. Red fill around genes and proteins indicate  
201 cytochrome-*c* proteins. Black outlines around blue circles in D indicate type I nitrous oxide  
202 reductase to distinguish from blue dots (type II/cytochrome-nitrous oxide reductase). Gray-  
203 shaded genes on the *occ* gene cluster indicate 6-NHL repeat proteins. Protein locations shown  
204 are based on P-sort predictions. Numbers above genes indicate number of CxxCH motifs  
205 predicted to bind cytochrome *c*. IM: inner membrane; OM: outer membrane. For more details,  
206 see **Table 1** and **Table S3**.

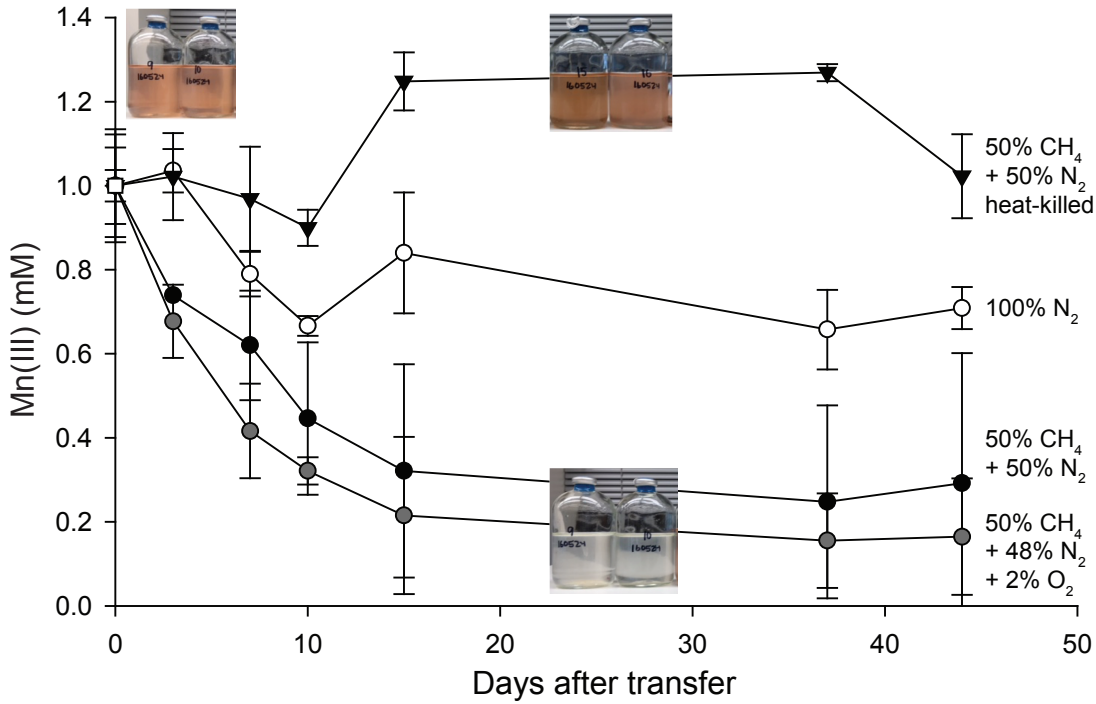

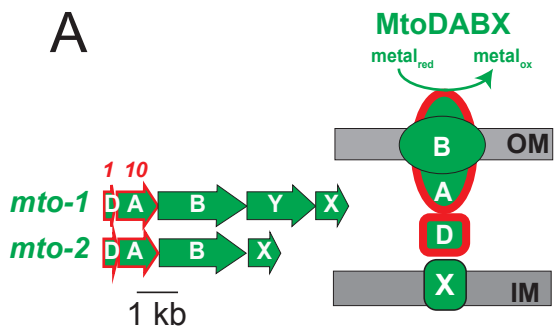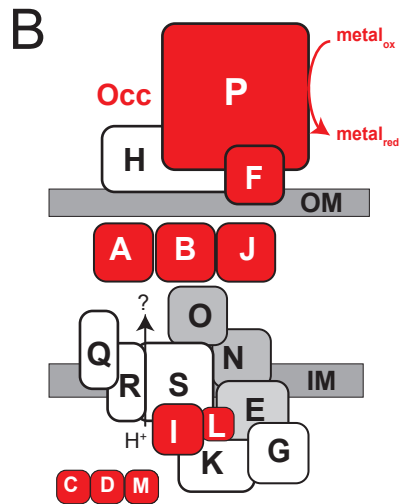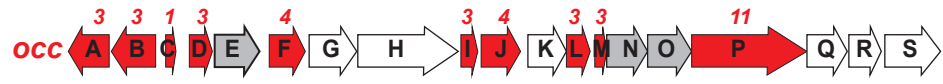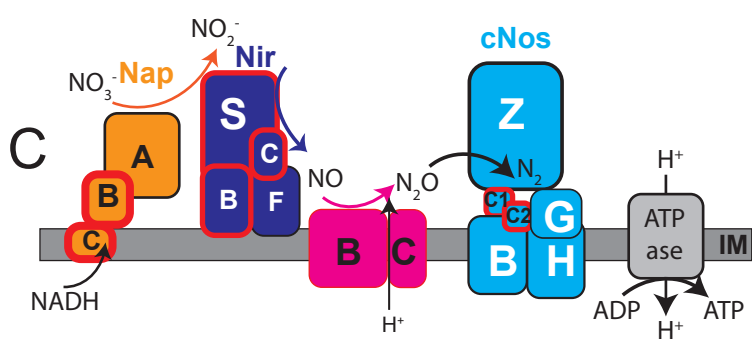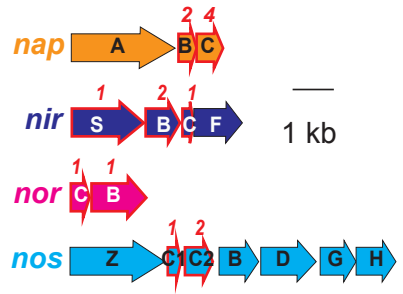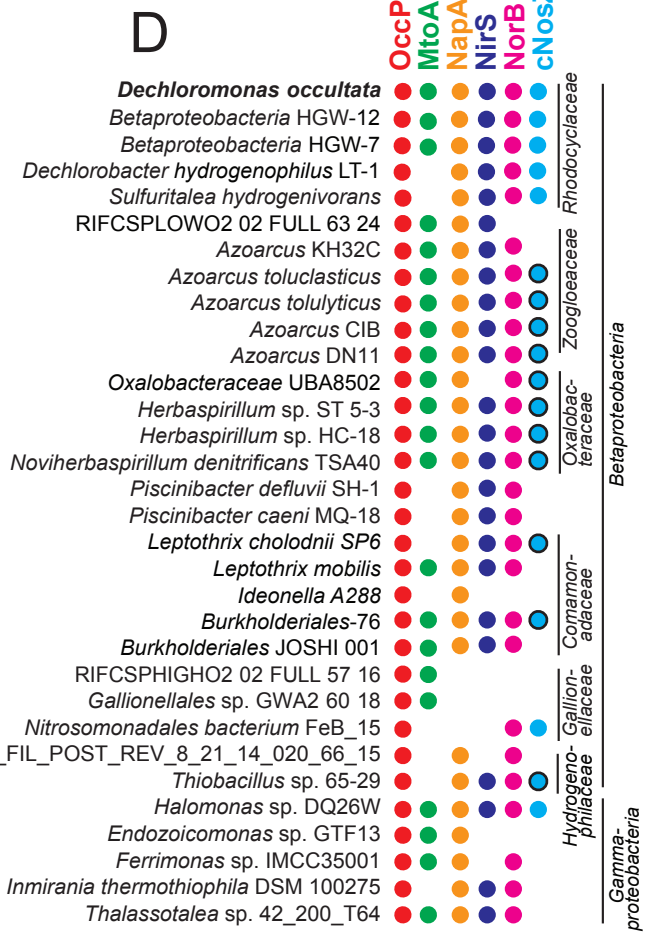

| Enzyme                                       | Function                                          | SP       | TMH      | CxxCH    | P-sort          | NCBI ID         | Normalized peptide counts |             |                |            | CH4/N2     |             | P value       |
|----------------------------------------------|---------------------------------------------------|----------|----------|----------|-----------------|-----------------|---------------------------|-------------|----------------|------------|------------|-------------|---------------|
|                                              |                                                   |          |          |          |                 |                 | CH <sub>4</sub>           | SD          | N <sub>2</sub> | SD         | ave        | SD          |               |
| <b><i>Ca. Dechloromonas occultata</i></b>    |                                                   |          |          |          |                 |                 |                           |             |                |            |            |             |               |
| Mto-1                                        | MtoX-1 (cyt-b)                                    | N        | 5        | 0        | IM              | RIX49676        |                           |             |                |            |            |             |               |
|                                              | MtoY-1 (MCP)                                      | N        | 2        | 1        | IM              | RIX49677        | 2.7                       | 0.5         | 3.6            | 0.2        | 0.8        | 0.2         | 0.2           |
|                                              | MtoB-1 (porin)                                    | Y        | 0        | 0        | OM              | RIX49678        | 10                        | 2           | 15             | 2          | 0.6        | 0.1         | 0.004         |
|                                              | MtoA-1                                            | Y        | 1        | 10       | P               | RIX49874        | 5                         | 1           | 2.5            | 0.1        | 1.9        | 0.4         | 0.1           |
|                                              | MtoD-1                                            | N        | 0        | 1        | P               | RIX49875        |                           |             |                |            |            |             |               |
| Mto-2                                        | MtoX-2 (cyt-b)                                    | N        | 4        | 0        | IM              | RIX48942        |                           |             |                |            |            |             |               |
|                                              | MtoB-2 (porin)                                    | Y        | 0        | 0        | OM              | RIX48943        | 8                         | 1           | 16             | 0.2        | 0.5        | 0.1         | 0.04          |
|                                              | MtoA-2                                            | Y        | 1        | 10       | P               | RIX48944        | 7.3                       | 0.8         | 4              | 2          | 2.1        | 1.3         | 0.2           |
|                                              | <b>MtoD-2</b>                                     | <b>Y</b> | <b>1</b> | <b>1</b> | <b>U</b>        | <b>RIX48945</b> | <b>2.6</b>                | <b>0.3</b>  | <b>0.7</b>     | <b>0.3</b> | <b>4.0</b> | <b>1.4</b>  | <b>0.003</b>  |
| Occ                                          | <b>OccA</b>                                       | <b>Y</b> | <b>1</b> | <b>3</b> | <b>P</b>        | <b>RIX49688</b> | <b>4</b>                  | <b>0.5</b>  | <b>0.7</b>     | <b>0.6</b> | <b>7.8</b> | <b>5.7</b>  | <b>0.01</b>   |
|                                              | <b>OccB</b>                                       | <b>Y</b> | <b>0</b> | <b>3</b> | <b>U</b>        | <b>RIX49689</b> | <b>41</b>                 | <b>4</b>    | <b>19</b>      | <b>2</b>   | <b>2.2</b> | <b>0.0</b>  | <b>0.03</b>   |
|                                              | OccC                                              | N        | 0        | 1        | U               | RIX49877        |                           |             |                |            |            |             |               |
|                                              | OccD                                              | N        | 0        | 3        | U               | RIX49878        |                           |             |                |            |            |             |               |
|                                              | OccE (6-NHL)                                      | N        | 1        | 0        | U               | RIX49690        | 22                        | 2.1         | 20.5           | 0.2        | 1.1        | 0.1         | 0.2           |
|                                              | OccF                                              | Y        | 2        | 4        | E               | RIX49691        | 13                        | 0.7         | 10.1           | 0.1        | 1.3        | 0.1         | 0.06          |
|                                              | <b>OccG (PPIase)</b>                              | <b>N</b> | <b>0</b> | <b>0</b> | <b>U</b>        | <b>RIX49692</b> | <b>14</b>                 | <b>1</b>    | <b>3.3</b>     | <b>0.5</b> | <b>4.2</b> | <b>0.3</b>  | <b>0.01</b>   |
|                                              | OccH                                              | N        | 0        | 0        | OM/E            | RIX49693        | 6.0                       | 0.2         | 7.7            | 0.6        | 0.8        | 0.1         | 0.10          |
|                                              | OccI                                              | N        | 1        | 3        | U               | RIX49694        | 7                         | 2.5         | 2.3            | 0.0        | 2.9        | 1.1         | 0.1           |
|                                              | <b>OccJ</b>                                       | <b>Y</b> | <b>0</b> | <b>4</b> | <b>U</b>        | <b>RIX49879</b> | <b>44</b>                 | <b>0.2</b>  | <b>19</b>      | <b>3</b>   | <b>2.4</b> | <b>0.4</b>  | <b>0.03</b>   |
|                                              | <b>OccK</b>                                       | <b>N</b> | <b>0</b> | <b>0</b> | <b>C</b>        | <b>RIX49880</b> | <b>39</b>                 | <b>6</b>    | <b>13</b>      | <b>1</b>   | <b>3.0</b> | <b>0.2</b>  | <b>0.04</b>   |
|                                              | OccL                                              | N        | 1        | 3        | U               | RIX49695        |                           |             |                |            |            |             |               |
|                                              | OccM                                              | N        | 0        | 3        | U               | RIX49881        |                           |             |                |            |            |             |               |
|                                              | OccN (6 NHL)                                      | N        | 2        | 0        | U               | RIX49696        | 5.7                       | 0.3         | 6              | 1          | 0.9        | 0.1         | 0.2           |
|                                              | OccO (6 NHL)                                      | N        | 0        | 0        | U               | RIX49882        | 1.2                       | 0.8         | 4.2            | 0.4        | 0.3        | 0.2         | 0.03          |
|                                              | OccP                                              | N        | 0        | 11       | E               | RIX49697        | 14                        | 2           | 12             | 3          | 1.2        | 0.5         | 0.4           |
|                                              | OccQ                                              | Y        | 4        | 0        | IM              | RIX49698        |                           |             |                |            |            |             |               |
| OccR                                         | N                                                 | 8        | 0        | IM       | RIX49883        |                 |                           |             |                |            |            |             |               |
| OccS                                         | N                                                 | 12       | 0        | IM       | RIX49699        |                 |                           |             |                |            |            |             |               |
| Cyt c                                        | <b>Cyt c5</b>                                     | <b>N</b> | <b>1</b> | <b>1</b> | <b>U</b>        | <b>RIX47670</b> | <b>27</b>                 | <b>2</b>    | <b>9</b>       | <b>3</b>   | <b>3.2</b> | <b>0.8</b>  | <b>0.01</b>   |
|                                              | Cyt c5                                            | Y        | 1        | 2        | P               | RIX40984        | 19                        | 2           | 6              | 1          | 3.3        | 1.0         | 0.06          |
|                                              | Cyt c'/C_2                                        | Y        | 1        | 1        | P               | RIX44710        | 17                        | 5           | 3.6            | 0.8        | 4.8        | 2.3         | 0.09          |
|                                              | Cyt c'/C_2                                        | Y        | 1        | 1        | P               | RIX49630        | 7                         | 1           | 1.2            | 0.9        | 8.2        | 6.6         | 0.07          |
|                                              | Cyt c551/c552                                     | Y        | 0        | 1        | P               | RIX49087        | 13                        | 3           | 2.8            | 0.0        | 4.8        | 1.1         | 0.06          |
|                                              | Cyt c4                                            | Y        | 0        | 2        | P               | RIX48804        | 16                        | 0.8         | 9.8            | 0.8        | 1.6        | 0.2         | 0.06          |
|                                              | <b>Cyt c4</b>                                     | <b>Y</b> | <b>0</b> | <b>2</b> | <b>P</b>        | <b>RIX44782</b> | <b>4</b>                  | <b>2</b>    | <b>1.7</b>     | <b>0.7</b> | <b>2.6</b> | <b>0.1</b>  | <b>0.08</b>   |
| <b>Cyt c4</b>                                | <b>Y</b>                                          | <b>0</b> | <b>2</b> | <b>P</b> | <b>RIX45018</b> | <b>7</b>        | <b>0.6</b>                | <b>2.2</b>  | <b>0.2</b>     | <b>3.0</b> | <b>0.0</b> | <b>0.02</b> |               |
| Nap                                          | NapA                                              | Y        | 0        | 0        | P               | RIX41011        | 76                        | 2           | 67             | 3          | 1.1        | 0.1         | 0.1           |
|                                              | <b>NapB</b>                                       | <b>Y</b> | <b>1</b> | <b>2</b> | <b>P</b>        | <b>RIX41010</b> | <b>15</b>                 | <b>1</b>    | <b>5</b>       | <b>2</b>   | <b>3.2</b> | <b>0.9</b>  | <b>0.02</b>   |
|                                              | NapC                                              | N        | 1        | 4        | IM              | RIX41009        | 12                        | 3           | 13             | 1          | 1.0        | 0.2         | 0.1           |
| Nir                                          | NirS                                              | Y        | 0        | 1        | P               | RIX44719        | 58                        | 2           | 44             | 4          | 1.3        | 0.2         | 0.1           |
|                                              | NirB                                              | Y        | 1        | 2        | P               | RIX44720        | 14                        | 3           | 10             | 2          | 1.5        | 0.6         | 0.2           |
|                                              | NirC                                              | N        | 0        | 1        | P               | RIX44788        |                           |             |                |            |            |             |               |
|                                              | NirF                                              | Y        | 1        | 0        | P or C          | RIX44721        | 2                         | 1           | 7              | 1          | 0.3        | 0.1         | 0.02          |
| Nor                                          | NorC                                              | N        | 1        | 1        | IM              | RIX45182        | 3.5                       | 0.7         | 3.2            | 0.7        | 1.1        | 0.0         | 0.1           |
|                                              | NorB                                              | N        | 12       | 1        | IM              | RIX45183        |                           |             |                |            |            |             |               |
| cNos                                         | cNosZ                                             | Y        | 0        | 0        | P               | RIX42539        | 77                        | 17          | 66             | 8          | 1.2        | 0.3         | 0.2           |
|                                              | cNosC1                                            | Y        | 1        | 1        | P               | RIX42538        | 16                        | 2           | 4              | 2          | 5          | 3           | 0.08          |
|                                              | <b>cNosC2</b>                                     | <b>Y</b> | <b>1</b> | <b>2</b> | <b>P</b>        | <b>RIX42537</b> | <b>10</b>                 | <b>0.1</b>  | <b>3.9</b>     | <b>0.3</b> | <b>2.6</b> | <b>0.1</b>  | <b>0.02</b>   |
|                                              | cNosB                                             | N        | 6        | 0        | IM              | RIX42536        |                           |             |                |            |            |             |               |
|                                              | cNosD                                             | N        | 0        | 0        | P               | RIX42535        |                           |             |                |            |            |             |               |
|                                              | cNosG                                             | N        | 1        | 0        | C               | RIX42534        |                           |             |                |            |            |             |               |
| Qcr                                          | cNosH                                             | N        | 4        | 0        | IM              | RIX42533        |                           |             |                |            |            |             |               |
|                                              | QcrA                                              | N        | 9        | 0        | CM              | RIX41976        |                           |             |                |            |            |             |               |
|                                              | QcrB                                              | N        | 9        | 0        | CM              | RIX41977        |                           |             |                |            |            |             |               |
|                                              | QcrC                                              | N        | 1        | 0        | CM              | RIX41978        |                           |             |                |            |            |             |               |
| Proteases                                    | <b>Serine protease</b>                            | <b>N</b> | <b>0</b> | <b>0</b> | <b>P</b>        | <b>RIX49468</b> | <b>27</b>                 | <b>2</b>    | <b>1.0</b>     | <b>0.3</b> | <b>29</b>  | <b>10</b>   | <b>0.02</b>   |
|                                              | <b>Carboxyl-terminal protease (S41)</b>           | <b>N</b> | <b>1</b> | <b>0</b> | <b>CM</b>       | <b>RIX48818</b> | <b>18.5</b>               | <b>0.8</b>  | <b>8.0</b>     | <b>0.9</b> | <b>2.3</b> | <b>0.1</b>  | <b>0.0002</b> |
| Membrane/Extracellular                       | <b>DUF4214 protein</b>                            | <b>N</b> | <b>0</b> | <b>0</b> | <b>OM/E</b>     | <b>RIX44180</b> | <b>146</b>                | <b>25</b>   | <b>43</b>      | <b>0.6</b> | <b>3.4</b> | <b>0.5</b>  | <b>0.05</b>   |
|                                              | S-layer protein                                   | N        | 0        | 0        | U               | RIX44181        | 8                         | 0.5         | 10             | 0.6        | 0.8        | 0.1         | 0.14          |
|                                              | PEP-CTERM sorting                                 | Y        | 1        | 0        | E               | RIX45463        | 68                        | 6           | 33             | 10         | 2.1        | 0.5         | 0.03          |
|                                              | Tol-Pal system protein TolB                       | Y        | 0        | 0        | P               | RIX44015        | 20                        | 2           | 12             | 1          | 1.67       | 0.05        | 0.03          |
|                                              | <b>Peptidoglycan-associated lipoprotein (Pal)</b> | <b>N</b> | <b>0</b> | <b>0</b> | <b>OM</b>       | <b>RIX44016</b> | <b>27.3</b>               | <b>0.2</b>  | <b>10</b>      | <b>3</b>   | <b>3</b>   | <b>1</b>    | <b>0.04</b>   |
|                                              | Tol-Pal system protein YbgF                       | Y        | 0        | 0        | U               | RIX44017        | 10.8                      | 0.4         | 4              | 2          | 4          | 2           | 0.06          |
| Other                                        | <b>Pilus assembly protein</b>                     | <b>N</b> | <b>0</b> | <b>0</b> | <b>U</b>        | <b>RIX46961</b> | <b>54</b>                 | <b>5</b>    | <b>30</b>      | <b>5</b>   | <b>1.8</b> | <b>0.1</b>  | <b>0.001</b>  |
|                                              | <b>PQQ-dependent dehydrogenase</b>                | <b>Y</b> | <b>0</b> | <b>0</b> | <b>P</b>        | <b>RIX45050</b> | <b>37</b>                 | <b>4</b>    | <b>17</b>      | <b>1</b>   | <b>2.2</b> | <b>0.1</b>  | <b>0.03</b>   |
|                                              | <b>Phasin family granule-associated protein</b>   | <b>N</b> | <b>0</b> | <b>0</b> | <b>U</b>        | <b>RIX40682</b> | <b>49</b>                 | <b>2</b>    | <b>22</b>      | <b>1</b>   | <b>2.2</b> | <b>0.2</b>  | <b>0.03</b>   |
|                                              | <b>Phasin family granule-associated protein</b>   | <b>Y</b> | <b>0</b> | <b>0</b> | <b>U</b>        | <b>RIX40683</b> | <b>34</b>                 | <b>4</b>    | <b>16</b>      | <b>1</b>   | <b>2.1</b> | <b>0.0</b>  | <b>0.03</b>   |
|                                              | <b>High potential iron-sulfur protein</b>         | <b>Y</b> | <b>0</b> | <b>0</b> | <b>U</b>        | <b>RIX49681</b> | <b>10.79</b>              | <b>0.01</b> | <b>6.5</b>     | <b>0.4</b> | <b>1.7</b> | <b>0.1</b>  | <b>0.02</b>   |
| <b>Electron transfer flavoprotein (FixA)</b> | <b>N</b>                                          | <b>0</b> | <b>0</b> | <b>C</b> | <b>RIX43544</b> | <b>16</b>       | <b>3</b>                  | <b>10</b>   | <b>2</b>       | <b>1.7</b> | <b>0.0</b> | <b>0.04</b> |               |
| <b><i>Ca. Geobacter occultata</i></b>        |                                                   |          |          |          |                 |                 |                           |             |                |            |            |             |               |
| E-pilus                                      | <b>Type IV pilin PilA</b>                         | <b>N</b> | <b>1</b> | <b>0</b> | <b>E</b>        | <b>RNC67631</b> | <b>93</b>                 | <b>3</b>    | <b>18</b>      | <b>3</b>   | <b>5</b>   | <b>1</b>    | <b>0.02</b>   |
