1 **Novel insights into the taxonomic diversity and molecular mechanisms of bacterial Mn(III)**  
2 **reduction**

3 Nadia Szeinbaum<sup>1,2,5\*</sup>, Brook L. Nunn<sup>3</sup>, Amanda R. Cavazos<sup>2</sup>, Sean A. Crowe<sup>3</sup>, Frank J.  
4 Stewart<sup>1</sup>, Thomas J. DiChristina<sup>1</sup>, Christopher T. Reinhard<sup>2,5</sup>, and Jennifer B. Glass<sup>2,5\*</sup>

5  
6 <sup>1</sup>School of Biological Sciences, Georgia Institute of Technology, Atlanta, GA, USA

7 <sup>2</sup>School of Earth and Atmospheric Sciences, Georgia Institute of Technology, Atlanta, GA, USA

8 <sup>3</sup>Department of Genome Sciences, University of Washington, Seattle, WA, USA

9 <sup>4</sup>Department of Microbiology & Immunology and Department of Earth, Ocean, & Atmospheric  
10 Sciences, University of British Columbia, Vancouver, Canada

11 <sup>5</sup>NASA Astrobiology Institute, Alternative Earths Team, Mountain View, CA

12  
13 \*Corresponding author: [jennifer.glass@eas.gatech.edu](mailto:jennifer.glass@eas.gatech.edu)

14 **Running title:** Novel undecaheme in Betaproteobacteria

15

16

17 **Originality-significance Statement:** The prevalence of Mn(III)-ligand complexes in diverse  
18 aquatic environments is a recent geochemical discovery. Thus far, microbially-driven Mn(III)  
19 reduction has only been associated with *Gammaproteobacteria* encoding three-component outer-  
20 membrane porin-cytochrome c conduits. Here, we demonstrate that *Betaproteobacteria* dominate  
21 in abundance and protein expression during Mn(III) reduction in an enrichment culture. Using  
22 metaproteomics, we detect for the first time that *Betaproteobacteria* express a two-component  
23 porin-cytochrome c conduit, and an uncharacterized extracellular undecaheme c-type  
24 cytochrome. Although undecahemes have never been reported in *Betaproteobacteria*, we find  
25 that they are widespread in uncultivated strains. These results widen the phylogenetic diversity of  
26 Mn(III)-reducing bacteria, and provide new insights into potential molecular mechanisms for  
27 soluble Mn(III) reduction.

28

29 **Summary:** Soluble ligand-bound Mn(III) can support anaerobic microbial respiration in diverse  
30 aquatic environments. Thus far, Mn(III) reduction has only been associated with certain  
31 *Gammaproteobacteria*. Here, we characterized microbial communities enriched from Mn-replete  
32 sediments of Lake Matano, Indonesia. Our results provide the first evidence for biological  
33 reduction of soluble Mn(III) outside *Gammaproteobacteria*. Metagenome assembly and binning  
34 revealed a novel betaproteobacterium, which we designate “*Candidatus* Dechloromonas  
35 occultata.” This organism dominated the enrichment and expressed a porin-cytochrome c  
36 complex typically associated with iron-oxidizing *Betaproteobacteria* and a novel cytochrome c-  
37 rich protein cluster (Occ), including an undecaheme putatively involved in extracellular electron  
38 transfer. The *occ* gene cluster was detected in diverse aquatic bacteria, including uncultivated  
39 *Betaproteobacteria* from the deep subsurface. These observations provide new insight into the  
40 taxonomic and functional diversity of microbially-driven Mn(III) reduction in natural  
41 environments.  
42

43 **Introduction.** Manganese(III) is a strong oxidant with a reduction potential close to molecular  
44 oxygen (Kostka et al., 1995). Ligand-bound Mn(III) is often the most abundant dissolved Mn  
45 species in sediment porewaters (Madison et al., 2013; Oldham et al., 2019) and soils (Heintze  
46 and Mann, 1947). In the deep subsurface, microbes may rely on simple electron and carbon  
47 sources such as CH<sub>4</sub>, and metal oxide electron acceptors like Mn(III), to fuel anaerobic  
48 respiration (Beal et al., 2009). Manganese reduction coupled to CH<sub>4</sub> oxidation is a  
49 thermodynamically favorable metabolism, and its natural occurrence is supported by biological  
50 and geochemical evidence (Crowe et al., 2011; Riedinger et al., 2014). Despite clear evidence for  
51 the environmental importance of Mn(III), knowledge about microbial Mn(III) cycling pathways  
52 remain fragmentary.

53 To date, only *Shewanella* spp. (*Gammaproteobacteria*) have been confirmed to respire  
54 soluble Mn(III) (Kostka et al., 1995; Szeinbaum et al., 2014). *Shewanella* respire Mn(III) using  
55 the Mtr pathway (Szeinbaum et al., 2017), a porin-cytochrome (PCC) conduit that transports  
56 electrons across the periplasm for extracellular respiration of Mn(III/IV), Fe(III), and other  
57 metals (Richardson et al., 2012; Shi et al., 2016). Many Fe(II)-oxidizing *Betaproteobacteria* also  
58 contain PCCs (MtoAB, generally lacking the C subunit), which are proposed to oxidize Fe(II) to  
59 Fe(III) by running the PCC in reverse (Emerson et al., 2013; Kato et al., 2015; He et al., 2017).  
60 In some metal-reducing *Gammaproteobacteria* and *Deltaproteobacteria*, extracellular  
61 undecaheme (11-heme) UndA is thought to play a key functional role in soluble Fe(III) reduction  
62 (Fredrickson et al., 2008; Shi et al., 2011; Smith et al., 2013; Yang et al., 2013). UndA's crystal  
63 structure shows a surface-exposed heme surrounded by positive charges, which may bind  
64 negatively-charged soluble iron chelates (Edwards et al., 2012).

65 Environmental omics suggests that metal reduction by *Betaproteobacteria* may be  
66 widespread in the deep subsurface (Anantharaman et al., 2016; Hermsdorf et al., 2017). However,  
67 only a few Fe(III)-reducing *Betaproteobacteria* isolates have been characterized (Cummings et  
68 al., 1999; Finneran et al., 2003), and little is known about metal reduction pathways in  
69 *Betaproteobacteria*. Here, we explored microbial Mn(III) reduction in enrichments inoculated  
70 with sediment from Lake Matano, Indonesia, which has active microbial Mn and methane (CH<sub>4</sub>)  
71 cycles (Jones et al., 2011). Our results provide the first evidence for biological reduction of  
72 soluble Mn(III) outside *Gammaproteobacteria*.

73

## 74 **Results and discussion**

75 ***Enrichment of Mn(III)-reducing populations.*** We designed an enrichment strategy to select for  
76 microbes capable of anaerobic CH<sub>4</sub> oxidation coupled to soluble Mn(III) reduction by incubating  
77 anoxic Lake Matano communities with soluble Mn(III)-pyrophosphate as the electron acceptor  
78 (with 2% O<sub>2</sub> in a subset of bottles), and CH<sub>4</sub> as the sole electron donor and carbon source (see  
79 **Supporting Information** for enrichment details). Cultures were transferred into fresh media  
80 after Mn(III) was completely reduced to Mn(II), for a total of five transfers over 395 days. By  
81 the fourth transfer, cultures with CH<sub>4</sub> headspace (with or without 2% O<sub>2</sub>) reduced ~80% of  
82 soluble Mn(III) compared to ~30% with N<sub>2</sub> headspace (**Fig. 1**). 16S rRNA gene sequences were  
83 dominated by *Betaproteobacteria* (*Rhodocyclales*) and *Deltaproteobacteria*  
84 (*Desulfuromonadales*; **Fig. S1**). <sup>13</sup>CH<sub>4</sub> oxidation to <sup>13</sup>CO<sub>2</sub> was undetectable (**Fig. S2**).

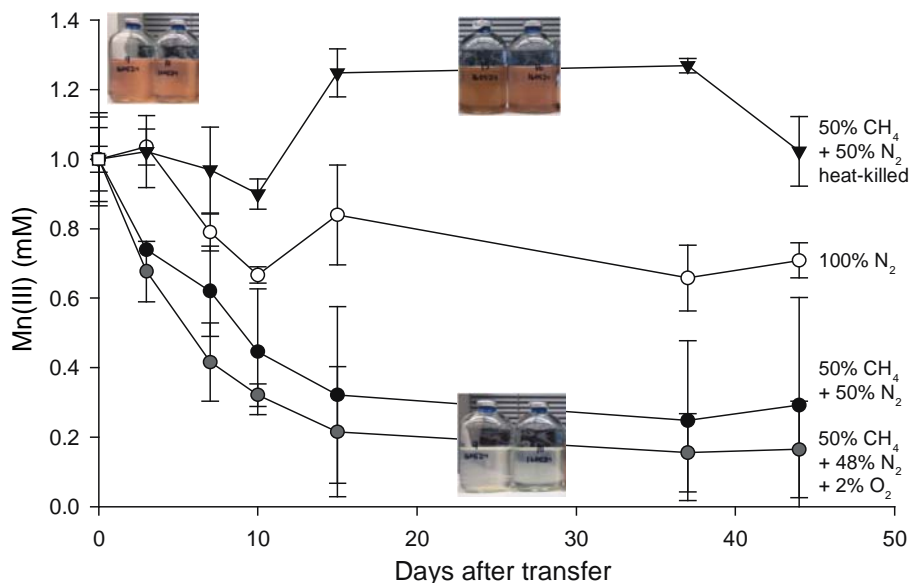

85

86 **Figure 1. Consumption of Mn(III) in Lake Matano enrichments in the presence and absence of methane.**

87 Sediment-free cultures (transfer 4) from 335 days after the initial enrichment were incubated for 45 days with 1 mM  
88 Mn(III) pyrophosphate as the sole electron acceptor. Initial bottle headspace contained 50% CH<sub>4</sub> + 50% N<sub>2</sub> (black  
89 circles), 50% CH<sub>4</sub>+48% N<sub>2</sub>+2% O<sub>2</sub> (gray circles), 100% N<sub>2</sub> (white circles), and 50% CH<sub>4</sub>+50% N<sub>2</sub> heat killed  
90 controls (black triangles). Error bars are standard deviations from duplicate experiments. Color change from red to  
91 clear indicates Mn(III) reduction.

92

93

Samples for metagenomic and metaproteomic analysis were harvested from the fifth

94 transfer (**Fig. 1; Fig. S1**). Out of 2,952 proteins identified in the proteome, 90% were assigned to

95 *Betaproteobacteria*; of those, 72% mapped to a 99.5% complete metagenome-assembled genome

96 (MAG; *Rhodocyclales* bacterium GT-UBC; NCBI accession QXPY01000000) with 81-82%

97 average nucleotide identity (ANI) and phylogenetic affiliation to *Dechloromonas* spp. (**Table**

98 **S1; Fig. S3**). This MAG is named here “*Candidatus* *Dechloromonas* *occultata*” sp. nov.;

99 etymology: *occultata*; (L. fem. adj. ‘hidden’). The remaining 10% of proteins mapped to

100 *Deltaproteobacteria*; of those, 70% mapped to a nearly complete MAG (*Desulfuromonadales*

101 bacterium GT-UBC; NCBI accession RHLS01000000) with 80% ANI to *Geobacter*

102 *sulfurreducens*. This MAG is named here “*Candidatus* *Geobacter* *occultata*”.

103

104 **Cytochrome expression during Mn(III) reduction.** Cytochromes containing multiple *c*-type  
105 hemes are key for electron transport during microbial metal transformations, and therefore might  
106 also be expected to play a role in Mn(III) reduction. Numerous mono-, di-, and multi (>3)-heme  
107 cytochromes (MHCs) were expressed by “*Ca. D. occultata*” in Mn(III)-reducing cultures. Nine  
108 out of 15 MHCs encoded by the “*Ca. D. occultata*” MAG were expressed, including two  
109 decahemes similar to MtoA in Fe(II)-oxidizing *Betaproteobacteria* (Tables 1, S2, S3; Figs. 2A,  
110 S4). Several highly expressed MHCs were encoded on a previously unreported 19-gene cluster  
111 with 10 cytochrome-*c* proteins, hereafter *occA-S* (Table 1; Figs. 2B, S5, S6). OccP was  
112 predicted to be an extracellular undecaheme protein of ~100 kDa (922 amino acids). “*Ca.*  
113 *Dechloromonas occultata*” may reduce Mn(III) using the novel extracellular undecaheme OccP  
114 as the terminal Mn(III) reductase. Experimental verification of the function of the putative Occ  
115 complex is currently limited by the scarcity of genetically tractable *Betaproteobacteria*.

116 **Table 1. Expression levels for “*Ca. D. occultata*” proteins in the presence of CH<sub>4</sub> and N<sub>2</sub>.** Peptide identifications  
117 from mass spectrometry using Comet (Eng et al., 2013) were matched with a metagenome-generated protein  
118 database using Prokka (Seemann, 2014), or RAST for bins (Wattam et al., 2013; Overbeek et al., 2014). Database  
119 searches were completed on PeptideProphet (Nesvizhskii et al., 2003). Calculated false discovery rates (FDR) were  
120 <0.01. Normalized spectral abundances were calculated in QPROT with Abacus (Choi et al., 2015). Peptide counts  
121 are normalized to total “*Ca. D. occultata*” proteins x 10,000. Blank cells indicate proteins with <2 normalized  
122 peptide counts. Gray boxes indicate membrane proteins that may be underrepresented by mass spectrometry-based  
123 metaproteomic analyses, which inherently favor soluble over insoluble membrane-bound or hydrophobic proteins.  
124 SP: signal peptide (Y:present/N:absent); TMH: numbers of transmembrane helices; # CxxCH: number of heme-  
125 binding motifs; P-sort: predicted cellular location based on Psortb v.3.0. Bold proteins indicate proteins that were  
126 significantly more expressed with CH<sub>4</sub> than N<sub>2</sub> (CH<sub>4</sub>/N<sub>2</sub>>1; p<0.05). MCP: methyl-accepting chemotaxis protein;  
127 PPIase: Peptidyl-proline isomerase; P: periplasm, C: cytoplasm; OM: outer membrane; IM: inner membrane, E:  
128 extracellular; U: unknown. MtoX and MtoY were predicted to be an inner membrane cytochrome-b protein and a  
129 methyl-accepting chemotaxis protein, respectively.

| Enzyme                                    | Function                                   | SP    | TMH | CxxCH | P-sort   | NCBIID   | Normalized peptide counts |      |                |     | CH4/N2 | P value |
|-------------------------------------------|--------------------------------------------|-------|-----|-------|----------|----------|---------------------------|------|----------------|-----|--------|---------|
|                                           |                                            |       |     |       |          |          | CH <sub>4</sub>           | SD   | N <sub>2</sub> | SD  |        |         |
| <b><i>Ca. Dechloromonas occultata</i></b> |                                            |       |     |       |          |          |                           |      |                |     |        |         |
| Mto-1                                     | MtoX-1 [cyt-b]                             | N     | 5   | 0     | IM       | RIX49676 |                           |      |                |     |        |         |
|                                           | MtoY-1 [MCP]                               | N     | 2   | 1     | IM       | RIX49677 | 2.7                       | 0.5  | 3.6            | 0.2 | 0.8    | 0.2     |
|                                           | MtoB-1 [porin]                             | Y     | 0   | 0     | OM       | RIX49678 | 10                        | 2    | 15             | 2   | 0.6    | 0.1     |
|                                           | MtoA-1                                     | Y     | 1   | 10    | P        | RIX49874 | 5                         | 1    | 2.5            | 0.1 | 1.9    | 0.4     |
| MtoD-1                                    | N                                          | 0     | 1   | P     | RIX49875 |          |                           |      |                |     |        |         |
| Mto-2                                     | MtoX-2 [cyt-b]                             | N     | 4   | 0     | IM       | RIX48942 |                           |      |                |     |        |         |
|                                           | MtoB-2 [porin]                             | Y     | 0   | 0     | OM       | RIX48943 | 8                         | 1    | 16             | 0.2 | 0.5    | 0.1     |
|                                           | MtoA-2                                     | Y     | 1   | 10    | P        | RIX48944 | 7.3                       | 0.8  | 4              | 2   | 2.1    | 1.3     |
|                                           | MtoD-2                                     | Y     | 1   | 1     | U        | RIX48945 | 2.6                       | 0.3  | 0.7            | 0.3 | 4.0    | 1.4     |
| Occ                                       | OccA                                       | Y     | 1   | 3     | P        | RIX49688 | 4                         | 0.5  | 0.7            | 0.6 | 7.8    | 5.7     |
|                                           | OccB                                       | Y     | 0   | 3     | U        | RIX49689 | 41                        | 4    | 19             | 2   | 2.2    | 0.0     |
|                                           | OccC                                       | N     | 0   | 1     | U        | RIX49877 |                           |      |                |     |        |         |
|                                           | OccD                                       | N     | 0   | 3     | U        | RIX49878 |                           |      |                |     |        |         |
|                                           | OccE [6-NHL]                               | N     | 1   | 0     | U        | RIX49690 | 22                        | 2.1  | 20.5           | 0.2 | 1.1    | 0.1     |
|                                           | OccF                                       | Y     | 2   | 4     | E        | RIX49691 | 13                        | 0.7  | 10.1           | 0.1 | 1.3    | 0.1     |
|                                           | OccG (PPase)                               | N     | 0   | 0     | U        | RIX49692 | 14                        | 1    | 3.3            | 0.5 | 4.2    | 0.3     |
|                                           | OccH                                       | N     | 0   | 0     | OM/E     | RIX49693 | 6.0                       | 0.2  | 7.7            | 0.6 | 0.8    | 0.1     |
|                                           | OccI                                       | N     | 1   | 3     | U        | RIX49694 | 7                         | 2.5  | 2.3            | 0.0 | 2.9    | 1.1     |
|                                           | OccJ                                       | Y     | 0   | 4     | U        | RIX49879 | 44                        | 0.2  | 19             | 3   | 2.4    | 0.4     |
|                                           | OccK                                       | N     | 0   | 0     | C        | RIX49880 | 39                        | 6    | 13             | 1   | 3.0    | 0.2     |
|                                           | OccL                                       | N     | 1   | 3     | U        | RIX49695 |                           |      |                |     |        |         |
|                                           | OccM                                       | N     | 0   | 3     | U        | RIX49881 |                           |      |                |     |        |         |
|                                           | OccN [6-NHL]                               | N     | 2   | 0     | U        | RIX49696 | 5.7                       | 0.3  | 6              | 1   | 0.9    | 0.1     |
|                                           | OccO [6-NHL]                               | N     | 0   | 0     | U        | RIX49882 | 1.2                       | 0.8  | 4.2            | 0.4 | 0.3    | 0.2     |
|                                           | OccP                                       | N     | 0   | 11    | E        | RIX49697 | 14                        | 2    | 12             | 3   | 1.2    | 0.5     |
|                                           | OccQ                                       | Y     | 4   | 0     | IM       | RIX49698 |                           |      |                |     |        |         |
|                                           | OccR                                       | N     | 8   | 0     | IM       | RIX49883 |                           |      |                |     |        |         |
|                                           | OccS                                       | N     | 12  | 0     | IM       | RIX49699 |                           |      |                |     |        |         |
|                                           | CytC                                       | CytC5 | N   | 1     | 1        | U        | RIX47670                  | 27   | 2              | 9   | 3      | 3.2     |
| CytC5                                     |                                            | Y     | 1   | 2     | P        | RIX40984 | 19                        | 2    | 6              | 1   | 3.3    | 1.0     |
| CytC'/C_2                                 |                                            | Y     | 1   | 1     | P        | RIX44710 | 17                        | 5    | 3.6            | 0.8 | 4.8    | 2.3     |
| CytC'/C_2                                 |                                            | Y     | 1   | 1     | P        | RIX49630 | 7                         | 1    | 1.2            | 0.9 | 8.2    | 6.6     |
| CytC551/c552                              |                                            | Y     | 0   | 1     | P        | RIX49067 | 13                        | 3    | 2.8            | 0.0 | 4.8    | 1.1     |
| CytC4                                     |                                            | Y     | 0   | 2     | P        | RIX48804 | 16                        | 0.8  | 9.8            | 0.8 | 1.6    | 0.2     |
| CytC4                                     |                                            | Y     | 0   | 2     | P        | RIX44762 | 4                         | 2    | 1.7            | 0.7 | 2.6    | 0.1     |
| Nap                                       | NapA                                       | Y     | 0   | 0     | P        | RIX41011 | 76                        | 2    | 67             | 3   | 1.1    | 0.1     |
|                                           | NapB                                       | Y     | 1   | 2     | P        | RIX41010 | 15                        | 1    | 5              | 2   | 3.2    | 0.9     |
|                                           | NapC                                       | N     | 1   | 4     | IM       | RIX41009 | 12                        | 3    | 13             | 1   | 1.0    | 0.2     |
| Nir                                       | NirS                                       | Y     | 0   | 1     | P        | RIX44719 | 58                        | 2    | 44             | 4   | 1.3    | 0.2     |
|                                           | NirB                                       | Y     | 1   | 2     | P        | RIX44720 | 14                        | 3    | 10             | 2   | 1.5    | 0.6     |
|                                           | NirC                                       | N     | 0   | 1     | P        | RIX44788 |                           |      |                |     |        |         |
|                                           | NirF                                       | Y     | 1   | 0     | P or C   | RIX44721 | 2                         | 1    | 7              | 1   | 0.3    | 0.1     |
| Nor                                       | NorC                                       | N     | 1   | 1     | IM       | RIX45182 | 3.5                       | 0.7  | 3.2            | 0.7 | 1.1    | 0.0     |
|                                           | NorB                                       | N     | 12  | 1     | IM       | RIX45183 |                           |      |                |     |        |         |
| cNos                                      | cNosZ                                      | Y     | 0   | 0     | P        | RIX42539 | 77                        | 17   | 66             | 8   | 1.2    | 0.3     |
|                                           | cNosC1                                     | Y     | 1   | 1     | P        | RIX42538 | 16                        | 2    | 4              | 2   | 5      | 3       |
|                                           | cNosC2                                     | Y     | 1   | 2     | P        | RIX42537 | 10                        | 0.1  | 3.9            | 0.3 | 2.6    | 0.1     |
|                                           | cNosB                                      | N     | 6   | 0     | IM       | RIX42536 |                           |      |                |     |        |         |
|                                           | cNosD                                      | N     | 0   | 0     | P        | RIX42535 |                           |      |                |     |        |         |
|                                           | cNosG                                      | N     | 1   | 0     | C        | RIX42534 |                           |      |                |     |        |         |
| Qcr                                       | QcrA                                       | N     | 9   | 0     | CM       | RIX41976 |                           |      |                |     |        |         |
|                                           | QcrB                                       | N     | 9   | 0     | CM       | RIX41977 |                           |      |                |     |        |         |
|                                           | QcrC                                       | N     | 1   | 0     | CM       | RIX41978 |                           |      |                |     |        |         |
| Proteases                                 | Serine protease                            | N     | 0   | 0     | P        | RIX49468 | 27                        | 2    | 1.0            | 0.3 | 29     | 10      |
|                                           | Carboxyl-terminal protease [S41]           | N     | 1   | 0     | CM       | RIX48818 | 18.5                      | 0.8  | 8.0            | 0.9 | 2.3    | 0.1     |
| Membrane/Extracellular                    | DUF4214 protein                            | N     | 0   | 0     | OM/E     | RIX44180 | 146                       | 25   | 43             | 0.6 | 3.4    | 0.5     |
|                                           | S-layer protein                            | N     | 0   | 0     | U        | RIX44181 | 8                         | 0.5  | 10             | 0.6 | 0.8    | 0.1     |
|                                           | PEP-CTERM sorting                          | Y     | 1   | 0     | E        | RIX45463 | 68                        | 6    | 33             | 10  | 2.1    | 0.5     |
|                                           | ToI-Pal system protein ToIB                | Y     | 0   | 0     | P        | RIX44015 | 20                        | 2    | 12             | 1   | 1.67   | 0.05    |
|                                           | Peptidoglycan-associated lipoprotein (Pal) | N     | 0   | 0     | OM       | RIX44016 | 27.3                      | 0.2  | 10             | 3   | 3      | 1       |
|                                           | ToI-Pal system protein YbgF                | Y     | 0   | 0     | U        | RIX44017 | 10.8                      | 0.4  | 4              | 2   | 4      | 2       |
| Other                                     | PhlA assembly protein                      | N     | 0   | 0     | U        | RIX46961 | 54                        | 5    | 30             | 5   | 1.8    | 0.1     |
|                                           | PQQ-dependent dehydrogenase                | Y     | 0   | 0     | P        | RIX45050 | 37                        | 4    | 17             | 1   | 2.2    | 0.1     |
|                                           | Phasin family granule-associated protein   | N     | 0   | 0     | U        | RIX40682 | 49                        | 2    | 22             | 1   | 2.2    | 0.2     |
|                                           | Phasin family granule-associated protein   | Y     | 0   | 0     | U        | RIX40683 | 34                        | 4    | 16             | 1   | 2.1    | 0.0     |
|                                           | High potential iron-sulfur protein         | Y     | 0   | 0     | U        | RIX49681 | 10.79                     | 0.01 | 6.5            | 0.4 | 1.7    | 0.1     |
| <i>Ca. Geobacter occultata</i>            | Electron transfer flavoprotein (FixA)      | N     | 0   | 0     | C        | RIX43544 | 16                        | 3    | 10             | 2   | 1.7    | 0.0     |
|                                           | E-pilus Type IV pilin PilA                 | N     | 1   | 0     | E        | RMC67631 | 93                        | 3    | 18             | 3   | 5      | 1       |

130  
 131 Proteins with 40-60% identity to the expressed “*Ca. D. occultata*” OccP protein were  
 132 widely distributed in *Betaproteobacteria* from diverse freshwaters and deep subsurface  
 133 groundwaters, as well as several *Gammaproteobacteria* and one alphaproteobacterium (**Fig. 2D;**  
 134 **Table S3**). Most *occP*-containing bacteria also possessed *mtoA* and denitrification genes (**Fig.**  
 135 **2D; Figs. S7, S8**). These results widen the phylogenetic and structural diversity of candidate  
 136 extracellular MHCs that may be involved in microbial Mn(III) reduction.



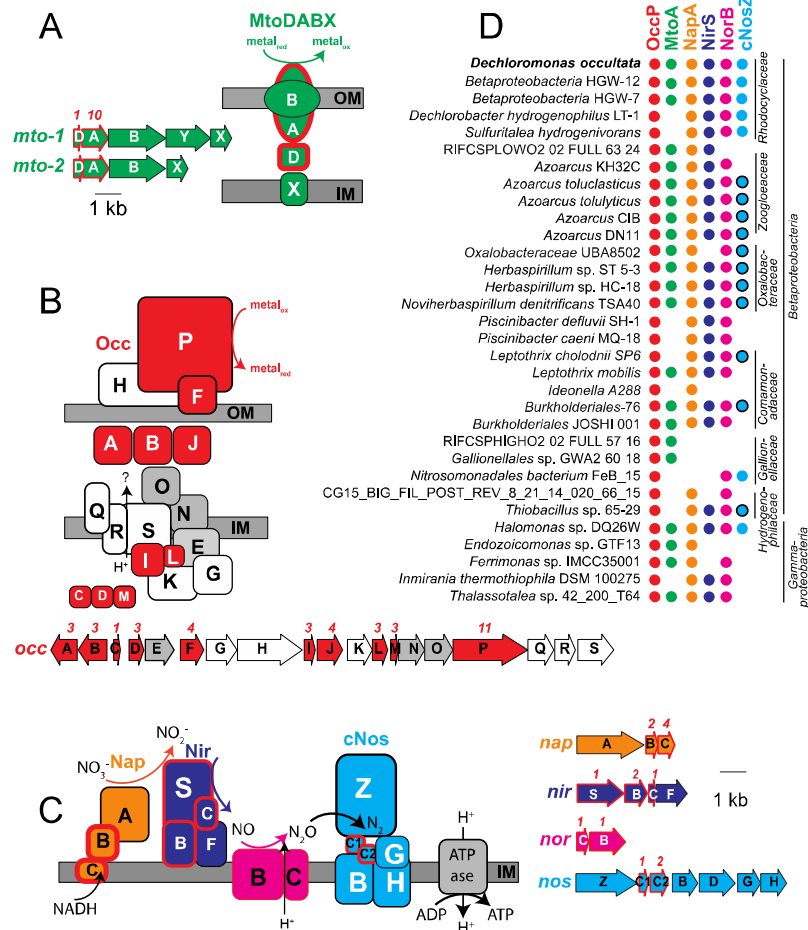

137  
 138 **Figure 2. Gene arrangement, predicted protein location, and taxonomic distribution of major expressed**  
 139 **respiratory complexes in “Ca. D. occultata”.** **A:** MtoDAB(Y)X porin-cytochrome c electron conduit; **B:** OccA-S;  
 140 **C:** denitrification complexes (Nap, Nir, Nor and cNos); **D:** Occurrence of key marker genes in *Betaproteobacteria*  
 141 and *Gamma-proteobacteria* with >95% complete genomes that encode OccP. Protein sequences from “*Ca. D.*  
 142 *occultata*” were used as query against a genome database and searched using PSI BLAST. Matches with identities  
 143 >40%, query coverage >80% and E values <10<sup>-5</sup> were considered positive. Red fill around genes and proteins  
 144 indicate cytochrome-*c* proteins. Black outlines around blue circles in D indicate type I nitrous oxide reductase to  
 145 distinguish from blue dots (type II/cytochrome-nitrous oxide reductase). Gray-shaded genes on the *occ* gene cluster  
 146 indicate 6-NHL repeat proteins. Protein locations shown are based on P-sort predictions. Numbers above genes  
 147 indicate number of CxxCH motifs predicted to bind cytochrome *c*. IM: inner membrane; OM: outer membrane. For  
 148 more details, see **Table 1** and **Table S3**.  
 149

150 **Heme-copper oxidases in “Ca. D. occultata”.** “*Ca. D. occultata*” expressed high-affinity cbb<sub>3</sub>-  
 151 type cytochrome c oxidase (CcoNOQP) associated with microaerobic respiration (**Table S4**).

152 Features of the “*Ca. D. occultata*” *occS* gene product, including conserved histidine residues (H-  
 153 94, H-411, and H-413) that bind hemes a and a<sub>3</sub>, as well as the H-276 residue that binds Cu<sub>B</sub>  
 154 (**Fig. S6**), suggest that OccS may function similarly to CcoN, the terminal heme-copper oxidase  
 155 proton pump in aerobic respiration. All identified OccS amino acid sequences lack Cu<sub>B</sub> ligands

156 Y-280 and H-403, and most lack Cu<sub>B</sub> ligands H-325 and H-326. OccS sequences also lack polar  
157 and ionizable amino acids that comprise the well-studied D and K channels involved in proton  
158 translocation in characterized cytochrome c oxidases (Blomberg and Siegbahn, 2014), but  
159 contain conserved H, C, E, D, and Y residues that may serve as alternate proton translocation  
160 pathways, similar to those recently discovered in qNOR (Gonska et al., 2018). OccS homologs  
161 were also found in *Azoarcus* spp. and deep subsurface *Betaproteobacteria* (**Fig. S6**).

162

### 163 *Expression of denitrification proteins and possible sources of oxidized nitrogen species.*

164 Periplasmic nitrate reductase (NapA), cytochrome nitrite reductase (NirS), and type II atypical  
165 nitrous oxide reductase (cNosZ; **Fig. S7**) were highly expressed by “*Ca. D. occultata*” (**Table 1**).  
166 Expression of the denitrification pathway was not expected because oxidized nitrogen species  
167 were not added to the medium, to which the only nitrogen supplied was NH<sub>4</sub>Cl (0.2 mM) and N<sub>2</sub>  
168 in the headspace. Nitrification genes were not found in the metagenome. Because solid-phase  
169 Mn(III) is known to chemically oxidize NH<sub>4</sub><sup>+</sup> (Aigle et al., 2017; Boumaiza et al., 2018), we  
170 tested for abiotic NH<sub>4</sub><sup>+</sup> oxidation by soluble Mn(III) (1 mM). Ammonium concentrations  
171 remained unchanged, and no N<sub>2</sub>O or NO<sub>x</sub><sup>-</sup> production was observed (**Fig. S8**), likely because our  
172 experiments lacked solid surfaces to mediate electron transfer. These findings are consistent with  
173 lack of detectable ammonium oxidation by Mn(III) pyrophosphate in estuarine sediments (Crowe  
174 et al., 2012). The close redox potential of Mn<sup>3+</sup>-pyrophosphate (~0.8 V; Yamaguchi and Sawyer,  
175 1985) to oxidized nitrogen species (0.35-0.75 V at circumneutral pH) and the lack of oxygen in  
176 the media could have induced the expression of denitrification genes simultaneously with  
177 Mn(III)-reduction genes. *Gammaproteobacteria*, for example, reduce Mn(III) even in the  
178 presence of nitrate (Kostka et al., 1995).

179  
180 **Carbon metabolism.** “*Ca. D. occultata*” appeared to be growing mixotrophically. It expressed  
181 two CO<sub>2</sub>-assimilation pathways, a modified Calvin-Benson-Bassham (CBB) pathway, an open 3-  
182 hydroxypropionate (3-HP) pathway, the oxidative TCA cycle (including citrate synthase and 2-  
183 oxoglutarate dehydrogenase), and organic carbon transporters (**Table S4; Fig. S9**). Like *D.*  
184 *agitata* and *D. denitrificans*, the CBB pathway of “*Ca. D. occultata*” did not encode RuBisCO  
185 and sedoheptulose-1,7-bisphosphatase (SHbisPase; **Fig. S10**); SHbisPase may be replaced by 6-  
186 phosphofructokinase and an energy-generating pyrophosphatase (RIX41248; Kleiner et al.,  
187 2012; Zorz et al., 2018). A hypothetical signal peptide-containing protein (RIX43053) in  
188 between fructose-bisphosphatase and transketolase was more highly expressed during growth on  
189 CH<sub>4</sub> vs. N<sub>2</sub>. “*Ca. D. occultata*” also encodes citrate lyase and 2-oxoglutarate/ferredoxin  
190 oxidoreductase indicative of a reductive TCA cycle, but these enzymes were not detected in the  
191 proteomic data.

192 Methane stimulated Mn(III) reduction and cytochrome expression in “*Ca. D. occultata*”  
193 enrichment cultures. However, we did not detect isotopically labeled CO<sub>2</sub> (**Fig. S2**) and  
194 proteomic evidence of carbon assimilation indicated that “*Ca. D. occultata*” assimilated organic  
195 carbon and not one-carbon compounds. “*Ca. D. occultata*” also expressed a PQQ-dependent  
196 methanol/ethanol dehydrogenase at higher levels in the presence of CH<sub>4</sub> than N<sub>2</sub> (p=0.03; **Table**  
197 **1**). A PQQ-methanol dehydrogenase has been implicated in methylotrophy in *Rhodocyclales*  
198 (Kalyuzhnaya et al., 2008). Our search for any other genes that could encode proteins capable of  
199 CH<sub>4</sub> oxidation recovered a cytochrome P450 (RIX47519) with 42% identity to  
200 *Methylobacterium organophilum*, which is capable of methanotrophy by an unknown  
201 mechanism (Green and Bousfield, 1983; Dedysh et al., 2004; Van Aken et al., 2004). Oxidation

202 of methane to methanol by cytochrome P450 or another enzyme would serve as a substrate for  
203 pyrroloquinoline quinone (PQQ)-methanol dehydrogenase. However, RIX47519 was undetected  
204 in the proteomic data.

205 While the specific role of CH<sub>4</sub> in Mn(III) reduction remains unknown, CH<sub>4</sub> appeared to  
206 significantly stimulate expression of many cytochrome *c* proteins, including OccABGJK, MtoD-  
207 2, and cytochrome-*c4* and -*c5* proteins associated with anaerobic respiration ( $p < 0.05$ ; **Table 1**;  
208 **Fig. 2C**). Expression of several “*Ca. D. occultata*” proteins involved in outer membrane structure  
209 and composition, including an extracellular DUF4214 protein located next to an S-layer protein  
210 similar to those involved in manganese binding and deposition (Wang et al., 2009), a serine  
211 protease possibly involved in Fe(III) particle attachment (Burns et al., 2009), an extracellular  
212 PEP-CTERM sorting protein for protein export (Haft et al., 2006), and a Tol-Pal system for outer  
213 membrane integrity, were also higher in the presence of CH<sub>4</sub> (**Table 1**). Lack of proteomic and  
214 isotopic evidence for use of CH<sub>4</sub> as an electron donor suggests that CH<sub>4</sub> may be indirectly  
215 involved in Mn(III) reduction in “*Ca. D. occultata*”, possibly by lowering the redox potential of  
216 the cultures to favor higher rates of Mn(III) reduction than in N<sub>2</sub>-only cultures.

217  
218 **Transporters and sensors.** Numerous transporters were present in the “*Ca. D. occultata*”  
219 genome, including 26 TonB-dependent siderophore transporters, 13 TRAP transporters for  
220 dicarboxylate transport, as well as ABC transporters for branched-chained amino acids and  
221 dipeptides and polypeptides (**Table S4**). “*Ca. D. occultata*” also contained a large number of  
222 environmental sensing genes: 52 bacterial hemoglobins with PAS-PAC sensors, 8 TonB-  
223 dependent receptors, and 8 NO responsive regulators (Dnr: Crp/fr family; **Table S4**). Uniquely  
224 in “*Ca. D. occultata*”, PAC-PAS sensors flanked accessory genes *nosFLY* on the *c-nosZ* operon

225 **(Fig. S7)**. Comparison of these flanking PAC-PAS sensors in “*Ca. D. occultata*” with O<sub>2</sub>-binding  
226 sensors revealed that an arginine ~20 aa upstream from the conserved histidine as the distal  
227 pocket ligand for O<sub>2</sub>-binding is not present in either sensor **(Fig. S11)**, suggesting that the sensor  
228 may bind a different ligand, possibly NO, consistent with the placement of these genes next to  
229 cNosZ (Shimizu et al., 2015).

230

231 **Nutrient storage.** Active synthesis of storage polymers suggested that “*Ca. D. occultata*” was  
232 experiencing electron acceptor starvation at the time of harvesting, consistent with Mn(III)  
233 depletion in the bottles (Liu et al., 2015; Guanghuan et al., 2018). Polyphosphate-related  
234 proteins, including phosphate transporters, polyphosphate kinase, polyphosphatase, and poly-3-  
235 hydroxybutyrate synthesis machinery were detected in the proteome **(Table S4)**. Polyphosphate-  
236 accumulating organisms store polyphosphates with energy generated from organic carbon  
237 oxidation during aerobic respiration or denitrification, which are later hydrolyzed when  
238 respiratory electron acceptors for ATP production are limiting. Cyanophycin was being actively  
239 synthesized for nitrogen storage.

240

241 **Geobacter.** “*Ca. G. occultata*” expressed genes involved in the TCA cycle and subsequent  
242 pathways for energy-generation included citrate synthase, malate dehydrogenase, isocitrate  
243 dehydrogenase, fumarate hydratase and NADH-ubiquinone oxidoreductase at moderate  
244 abundance. “*Ca. Geobacter occultata*” contained 17 multiheme c-type cytochromes, none of  
245 which were detected in the proteome. The lack of expression of electron transport and metal-  
246 reducing pathways makes it unlikely that “*Ca. Geobacter occultata*” was solely responsible for  
247 Mn(III) reduction observed in the incubations. It is possible that “*Ca. G. occultata*” and “*Ca. D.*  
248 *occultata*” engage in direct interspecies electron transport via e-pilins. A type IV pilin with 87%

249 identity to *Geobacter pickeringii* (Holmes et al., 2016) was significantly more highly expressed  
250 with CH<sub>4</sub> vs. N<sub>2</sub> in the “*Ca. G. occultata*” proteome (p=0.02; Table 1). The possible involvement  
251 of *Geobacter* e-pilins in Mn(III) reduction remains an open question, due to the lack of studies  
252 examining the possibility of Mn(III) reduction in *Deltaproteobacteria*.

253  
254 **Conclusions.** To our knowledge, this study provides the first evidence for biological reduction of  
255 soluble Mn(III) by a bacterium outside of the *Gammaproteobacteria* class. The dominant  
256 bacterium in Mn(III)-reducing enrichment cultures was “*Ca. D. occultata*”, a member of the  
257 *Rhodocyclales* order of *Betaproteobacteria*. “*Ca. D. occultata*” expressed decahemes similar to  
258 the Mto pathway, and *occ* genes, including a novel extracellular undecaheme (OccP), which are  
259 predicted to encode a new respiratory electron transport pathway. The novel *occ* operon was  
260 found to be widespread in *Betaproteobacteria* from the deep subsurface, where metal cycling can  
261 fuel microbial metabolism.

262         Puzzles remain about whether “*Ca. D. occultata*” can transform two potent greenhouse  
263 gases: methane and nitrous oxide. Although “*Ca. D. occultata*” was enriched with methane as the  
264 sole electron donor and cultures reduced Mn(III) more rapidly in the presence of CH<sub>4</sub>, no CH<sub>4</sub>  
265 oxidation activity was measured in Mn(III)-reducing cultures, and proteomic data suggested that  
266 “*Ca. D. occultata*” was growing mixotrophically rather than assimilating CH<sub>4</sub>. It is possible than  
267 CH<sub>4</sub> played an indirect role in Mn(III) reduction, perhaps by lowering the redox state of the  
268 cultures to conditions that were more favorable for anaerobic Mn(III) respiration. Further,  
269 although we did not add oxidized nitrogen compounds to our media, and Mn(III) did not  
270 chemically oxidize NH<sub>4</sub><sup>+</sup> under our culture conditions, type II nitrous oxide reductase (cNosZ)  
271 was one of the most abundant proteins expressed in Mn(III)-reducing cultures. The role of

272 cNosZ and other denitrification enzymes in “*Ca. D. occultata*” metabolism, and their possible  
273 connection to Mn(III) reduction, remain to be investigated.

274

275 **Acknowledgements.** This research was funded by NASA Exobiology grant NNX14AJ87G.  
276 Support was also provided by a Center for Dark Energy Biosphere Investigations (NSF-CDEBI  
277 OCE-0939564) small research grant and supported by the NASA Astrobiology Institute  
278 (NNA15BB03A) and a NASA Astrobiology Postdoctoral Fellowship to NS. SAC was supported  
279 through NSERC CRC, CFI, and Discovery grants. We thank Marcus Bray, Andrew Burns, Caleb  
280 Easterly, Pratik Jagtap, Cory Padilla, Angela Peña, Johnny Striepen, and Rowan Wolschleger for  
281 technical assistance. We thank Emily Weinert for helpful discussions.

282

283 **Competing Interests:** The authors declare no competing interests.

284

## 285 **References**

- 286 Aigle, A., Bonin, P., Iobbi-Nivol, C., Mejean, V., and Michotey, V. (2017) Physiological and  
287 transcriptional approaches reveal connection between nitrogen and manganese cycles in *Shewanella algae*  
288 C6G3. *Sci Rep* **7**: 44725.
- 289 Anantharaman, K., Brown, C.T., Hug, L.A., Sharon, I., Castelle, C.J., Probst, A.J., Thomas, B.C., Singh,  
290 A., Wilkins, M.J., Karaoz, U., Brodie, E.L., Williams, K.H., Hubbard, S.S., and Banfield, J.F. (2016)  
291 Thousands of microbial genomes shed light on interconnected biogeochemical processes in an aquifer  
292 system. *Nat Commun* **7**: 13219.
- 293 Beal, E.J., House, C.H., and Orphan, V.J. (2009) Manganese- and iron-dependent marine methane  
294 oxidation. *Science* **325**: 184-187.
- 295 Blomberg, M.R., and Siegbahn, P.E. (2014) Proton pumping in cytochrome c oxidase: Energetic  
296 requirements and the role of two proton channels. *Biochim Biophys Acta* **1837**: 1165-1177.
- 297 Boumaiza, H., Coustel, R., Despas, C., Ruby, C., and Bergaoui, L. (2018) Interaction of ammonium with  
298 birnessite: Evidence of a chemical and structural transformation in alkaline aqueous medium. *J Solid*  
299 *State Chem* **258**: 543-550.
- 300 Burns, J.L., Ginn, B.R., Bates, D.J., Dublin, S.N., Taylor, J.V., Apkarian, R.P., Amaro-Garcia, S., Neal,  
301 A.L., and DiChristina, T.J. (2009) Outer membrane-associated serine protease involved in adhesion of  
302 *Shewanella oneidensis* to Fe(III) oxides. *Environ Sci Technol* **44**: 68-73.
- 303 Choi, H., Kim, S., Fermin, D., Tsou, C.-C., and Nesvizhskii, A.I. (2015) QPROT: Statistical method for  
304 testing differential expression using protein-level intensity data in label-free quantitative proteomics. *J*  
305 *Proteomics* **129**: 121-126.
- 306 Crowe, S.A., Canfield, D.E., Mucci, A., Sundby, B., and Maranger, R. (2012) Anammox, denitrification  
307 and fixed-nitrogen removal in sediments from the Lower St. Lawrence Estuary. *Biogeosciences* **9**: 4309-  
308 4321.
- 309 Crowe, S.A., Katsev, S., Leslie, K., Sturm, A., Magen, C., Nomosatryo, S., Pack, M.A., Kessler, J.D.,  
310 Reeburgh, W.S., Roberts, J.A., Gonzalez, L., Douglas Haffner, G., Mucci, A., Sundby, B., and Fowle,  
311 D.A. (2011) The methane cycle in ferruginous Lake Matano. *Geobiology* **9**: 61-78.
- 312 Cummings, D.E., Caccavo, F., Spring, S., and Rosenzweig, R.F. (1999) *Ferribacterium limneticum*, gen.  
313 nov., sp. nov., an Fe(III)-reducing microorganism isolated from mining-impacted freshwater lake  
314 sediments. *Arch Microbiol* **171**: 183-188.
- 315 Dedysh, S.N., Dunfield, P.F., and Trotsenko, Y.A. (2004) Methane utilization by *Methylobacterium*  
316 species: new evidence but still no proof for an old controversy. *Int J Syst Evol Microbiol* **54**: 1919-1920.
- 317 Edwards, M.J., Hall, A., Shi, L., Fredrickson, J.K., Zachara, J.M., Butt, J.N., Richardson, D.J., and  
318 Clarke, T.A. (2012) The crystal structure of the extracellular 11-heme cytochrome UndA reveals a  
319 conserved 10-heme motif and defined binding site for soluble iron chelates. *Structure* **20**: 1275-1284.
- 320 Emerson, D., Field, E.K., Chertkov, O., Davenport, K.W., Goodwin, L., Munk, C., Nolan, M., and  
321 Woyke, T. (2013) Comparative genomics of freshwater Fe-oxidizing bacteria: implications for  
322 physiology, ecology, and systematics. *Front Microbiol* **4**: 254.



- 323 Eng, J.K., Jahan, T.A., and Hoopmann, M.R. (2013) Comet: an open-source MS/MS sequence database  
324 search tool. *Proteomics* **13**: 22-24.
- 325 Finneran, K.T., Johnsen, C.V., and Lovley, D.R. (2003) *Rhodoferax ferrireducens* sp. nov., a  
326 psychrotolerant, facultatively anaerobic bacterium that oxidizes acetate with the reduction of Fe(III). *Int J*  
327 *Syst Evol Microbiol* **53**: 669-673.
- 328 Fredrickson, J.K., Romine, M.F., Beliaev, A.S., Auchtung, J.M., Driscoll, M.E., Gardner, T.S., Nealson,  
329 K.H., Osterman, A.L., Pinchuk, G., and Reed, J.L. (2008) Towards environmental systems biology of  
330 *Shewanella*. *Nat Rev Microbiol* **6**: 592.
- 331 Gonska, N., Young, D., Yuki, R., Okamoto, T., Hisano, T., Antonyuk, S., Hasnain, S.S., Muramoto, K.,  
332 Shiro, Y., and Toshi, T. (2018) Characterization of the quinol-dependent nitric oxide reductase from the  
333 pathogen *Neisseria meningitidis*, an electrogenic enzyme. *Sci Rep* **8**: 3637.
- 334 Green, P.N., and Bousfield, I.J. (1983) Emendation of *Methylobacterium* Patt, Cole, and Hanson 1976;  
335 *Methylobacterium rhodinum* (Heumann 1962) comb. nov. corrig.; *Methylobacterium radiotolerans* (Ito  
336 and Iizuka 1971) comb. nov. corrig.; and *Methylobacterium mesophilicum* (Austin and Goodfellow 1979)  
337 comb. nov. *Int J Syst Evol Microbiol* **33**: 875-877.
- 338 Guanghuan, G., Jianqiang, Z., Aixia, C., Bo, H., Ying, C., Kun, G., Xiaoling, L., and Xiaoqian, D. (2018)  
339 Nitrogen removal and nitrous oxide emission in an anaerobic/oxic/anoxic sequencing biofilm Batch  
340 reactor. *Environ Eng Sci* **35**: 19-26.
- 341 Haft, D.H., Paulsen, I.T., Ward, N., and Selengut, J.D. (2006) Exopolysaccharide-associated protein  
342 sorting in environmental organisms: the PEP-CTERM/EpsH system. Application of a novel phylogenetic  
343 profiling heuristic. *BMC Biol* **4**: 29.
- 344 He, S., Barco, R.A., Emerson, D., and Roden, E.E. (2017) Comparative genomic analysis of neutrophilic  
345 iron(II) oxidizer genomes for candidate genes in extracellular electron transfer. *Front Microbiol* **8**.
- 346 Heintze, S., and Mann, P. (1947) Soluble complexes of manganic manganese. *J Agric Sci* **37**: 23-26.
- 347 Hernsdorf, A.W., Amano, Y., Miyakawa, K., Ise, K., Suzuki, Y., Anantharaman, K., Probst, A., Burstein,  
348 D., Thomas, B.C., and Banfield, J.F. (2017) Potential for microbial H<sub>2</sub> and metal transformations  
349 associated with novel bacteria and archaea in deep terrestrial subsurface sediments. *ISME J* **11**: 1915-  
350 1929.
- 351 Holmes, D.E., Dang, Y., Walker, D.J., and Lovley, D.R. (2016) The electrically conductive pili of  
352 *Geobacter* species are a recently evolved feature for extracellular electron transfer. *Microb Genom* **2**.
- 353 Jones, C., Crowe, S.A., Sturm, A., Leslie, K.L., MacLean, L.C.W., Katsev, S., Henny, C., Fowle, D.A.,  
354 and Canfield, D.E. (2011) Biogeochemistry of manganese in ferruginous Lake Matano, Indonesia.  
355 *Biogeosciences* **8**: 2977-2991.
- 356 Kalyuzhnaya, M.G., Hristova, K.R., Lidstrom, M.E., and Chistoserdova, L. (2008) Characterization of a  
357 novel methanol dehydrogenase in representatives of Burkholderiales: Implications for environmental  
358 detection of methylotrophy and evidence for convergent evolution. *J Bacteriol* **190**: 3817-3823.

- 359 Kato, S., Ohkuma, M., Powell, D.H., Krepski, S.T., Oshima, K., Hattori, M., Shapiro, N., Woyke, T., and  
360 Chan, C.S. (2015) Comparative genomic insights into ecophysiology of neutrophilic, microaerophilic iron  
361 oxidizing bacteria. *Front Microbiol* **6**: 1265.
- 362 Kleiner, M., Wentrup, C., Lott, C., Teeling, H., Wetzel, S., Young, J., Chang, Y.-J., Shah, M.,  
363 VerBerkmoes, N.C., Zarzycki, J., Fuchs, G., Markert, S., Hempel, K., Voigt, B., Becher, D., Liebeke, M.,  
364 Lalk, M., Albrecht, D., Hecker, M., Schweder, T., and Dubilier, N. (2012) Metaproteomics of a gutless  
365 marine worm and its symbiotic microbial community reveal unusual pathways for carbon and energy use.  
366 *Proc Natl Acad Sci* **109**: 1173-1182.
- 367 Kostka, J.E., Luther, G.W., and Nealson, K.H. (1995) Chemical and biological reduction of Mn(III)-  
368 pyrophosphate complexes - potential importance of dissolved Mn(III) as an environmental oxidant.  
369 *Geochim Cosmochim Acta* **59**: 885-894.
- 370 Liu, Y., Peng, L., Guo, J., Chen, X., Yuan, Z., and Ni, B.-J. (2015) Evaluating the role of microbial  
371 internal storage turnover on nitrous oxide accumulation during denitrification. *Sci Rep* **5**: 15138.
- 372 Madison, A.S., Tebo, B.M., Mucci, A., Sundby, B., and Luther, G.W., 3rd (2013) Abundant porewater  
373 Mn(III) is a major component of the sedimentary redox system. *Science* **341**: 875-878.
- 374 Nesvizhskii, A.I., Keller, A., Kolker, E., and Aebersold, R. (2003) A statistical model for identifying  
375 proteins by tandem mass spectrometry. *Anal Chem* **75**: 4646-4658.
- 376 Oldham, V.E., Siebecker, M.G., Jones, M.R., Mucci, A., Tebo, B.M., and Luther, G.W. (2019) The  
377 speciation and mobility of Mn and Fe in estuarine sediments. *Aquat Geochem* **25**: 3-26.
- 378 Overbeek, R., Olson, R., Pusch, G.D., Olsen, G.J., Davis, J.J., Disz, T., Edwards, R.A., Gerdes, S.,  
379 Parrello, B., Shukla, M., Vonstein, V., Wattam, A.R., Xia, F., and Stevens, R. (2014) The SEED and the  
380 Rapid Annotation of microbial genomes using Subsystems Technology (RAST). *Nucleic Acids Res* **42**:  
381 D206-214.
- 382 Richardson, D.J., Butt, J.N., Fredrickson, J.K., Zachara, J.M., Shi, L., Edwards, M.J., White, G., Baiden,  
383 N., Gates, A.J., and Marritt, S.J. (2012) The 'porin-cytochrome' model for microbe-to-mineral electron  
384 transfer. *Mol Microbiol* **85**: 201-212.
- 385 Riedinger, N., Formolo, M.J., Lyons, T.W., Henkel, S., Beck, A., and Kasten, S. (2014) An inorganic  
386 geochemical argument for coupled anaerobic oxidation of methane and iron reduction in marine  
387 sediments. *Geobiology* **12**: 172-181.
- 388 Seemann, T. (2014) Prokka: rapid prokaryotic genome annotation. *Bioinformatics* **30**: 2068-2069.
- 389 Shi, L., Belchik, S.M., Wang, Z., Kennedy, D.W., Dohnalkova, A.C., Marshall, M.J., Zachara, J.M., and  
390 Fredrickson, J.K. (2011) Identification and characterization of UndAHR-6, an outer membrane  
391 endoheme c-type cytochrome of *Shewanella* sp. strain HRCR-6. *Appl Environ Microbiol* **77**: 5521-  
392 5523.
- 393 Shi, L., Dong, H., Reguera, G., Beyenal, H., Lu, A., Liu, J., Yu, H.-Q., and Fredrickson, J.K. (2016)  
394 Extracellular electron transfer mechanisms between microorganisms and minerals. *Nat Rev Microbiol* **14**:  
395 651.

- 396 Shimizu, T., Huang, D., Yan, F., Stranova, M., Bartosova, M., Fojtíková, V., and Martínková, M.t. (2015)  
397 Gaseous O<sub>2</sub>, NO, and CO in signal transduction: structure and function relationships of heme-based gas  
398 sensors and heme-redox sensors. *Chem Rev* **115**: 6491-6533.
- 399 Smith, J.A., Lovley, D.R., and Tremblay, P.L. (2013) Outer cell surface components essential for Fe(III)  
400 oxide reduction by *Geobacter metallireducens*. *Appl Environ Microbiol* **79**: 901-907.
- 401 Szeinbaum, N., Burns, J.L., and DiChristina, T.J. (2014) Electron transport and protein secretion  
402 pathways involved in Mn(III) reduction by *Shewanella oneidensis*. *Environ Microbiol Rep* **6**: 490-500.
- 403 Szeinbaum, N., Lin, H., Brandes, J.A., Taillefert, M., Glass, J.B., and DiChristina, T.J. (2017) Microbial  
404 manganese(III) reduction fuelled by anaerobic acetate oxidation. *Environ Microbiol* **19**: 3475-3486.
- 405 Van Aken, B., Peres, C.M., Doty, S.L., Yoon, J.M., and Schnoor, J.L. (2004) *Methylobacterium populi*  
406 sp. nov., a novel aerobic, pink-pigmented, facultatively methylotrophic, methane-utilizing bacterium  
407 isolated from poplar trees (*Populus deltoides*×*nigra* DN34). *Int J Syst Evol Microbiol* **54**: 1191-1196.
- 408 Wang, X., Schröder, H.C., Schloßmacher, U., and Müller, W.E. (2009) Organized bacterial assemblies in  
409 manganese nodules: evidence for a role of S-layers in metal deposition. *Geo-Marine Letters* **29**: 85-91.
- 410 Wattam, A.R., Abraham, D., Dalay, O., Disz, T.L., Driscoll, T., Gabbard, J.L., Gillespie, J.J., Gough, R.,  
411 Hix, D., and Kenyon, R. (2013) PATRIC, the bacterial bioinformatics database and analysis resource.  
412 *Nucleic Acids Res* **42**: D581-D591.
- 413 Yamaguchi, K.S., and Sawyer, D.T. (1985) The redox chemistry of manganese(III) and manganese(IV)  
414 complexes. *Isr J Chem* **25**: 164-176.
- 415 Yang, Y., Chen, J., Qiu, D., and Zhou, J. (2013) Roles of UndA and MtrC of *Shewanella putrefaciens*  
416 W3-18-1 in iron reduction. *BMC Microbiol* **13**: 267.
- 417 Zorz, J.K., Kozłowski, J.A., Stein, L.Y., Strous, M., and Kleiner, M. (2018) Comparative proteomics of  
418 three species of ammonia-oxidizing bacteria. *Front Microbiol* **9**: 938.
- 419  
420

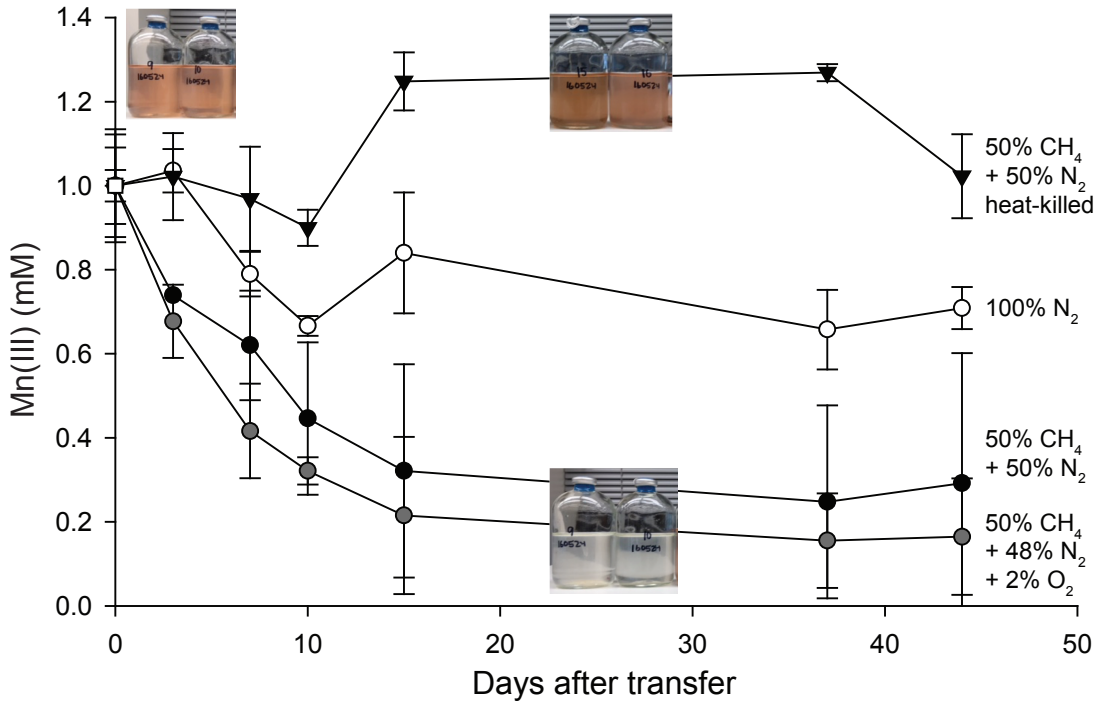

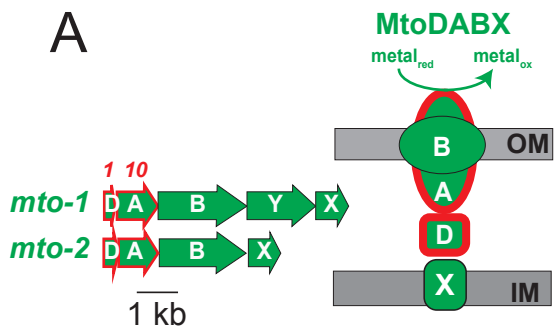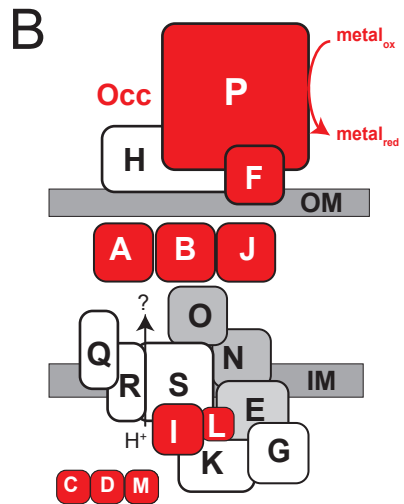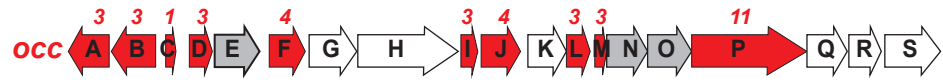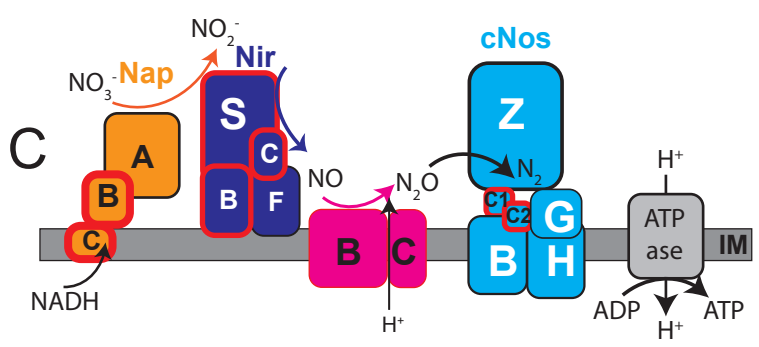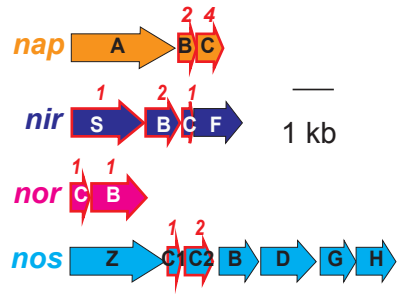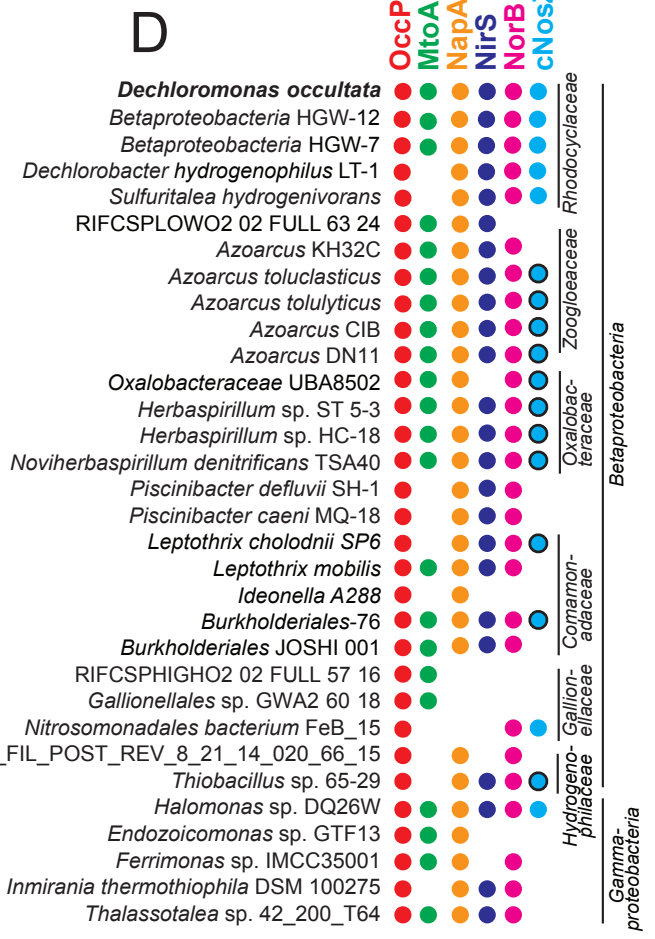

| Enzyme                                    | Function                                          | SP       | TMH      | CxxCH    | P-sort          | NCBI ID         | Normalized peptide counts |            |                |            | CH4/N2     |              | P value       |
|-------------------------------------------|---------------------------------------------------|----------|----------|----------|-----------------|-----------------|---------------------------|------------|----------------|------------|------------|--------------|---------------|
|                                           |                                                   |          |          |          |                 |                 | CH <sub>4</sub>           | SD         | N <sub>2</sub> | SD         | ave        | SD           |               |
| <b><i>Ca. Dechloromonas occultata</i></b> |                                                   |          |          |          |                 |                 |                           |            |                |            |            |              |               |
| Mto-1                                     | MtoX-1 (cyt-b)                                    | N        | 5        | 0        | IM              | RIX49676        |                           |            |                |            |            |              |               |
|                                           | MtoY-1 (MCP)                                      | N        | 2        | 1        | IM              | RIX49677        | 2.7                       | 0.5        | 3.6            | 0.2        | 0.8        | 0.2          | 0.2           |
|                                           | MtoB-1 (porin)                                    | Y        | 0        | 0        | OM              | RIX49678        | 10                        | 2          | 15             | 2          | 0.6        | 0.1          | 0.004         |
|                                           | MtoA-1                                            | Y        | 1        | 10       | P               | RIX49874        | 5                         | 1          | 2.5            | 0.1        | 1.9        | 0.4          | 0.1           |
|                                           | MtoD-1                                            | N        | 0        | 1        | P               | RIX49875        |                           |            |                |            |            |              |               |
| Mto-2                                     | MtoX-2 (cyt-b)                                    | N        | 4        | 0        | IM              | RIX48942        |                           |            |                |            |            |              |               |
|                                           | MtoB-2 (porin)                                    | Y        | 0        | 0        | OM              | RIX48943        | 8                         | 1          | 16             | 0.2        | 0.5        | 0.1          | 0.04          |
|                                           | MtoA-2                                            | Y        | 1        | 10       | P               | RIX48944        | 7.3                       | 0.8        | 4              | 2          | 2.1        | 1.3          | 0.2           |
|                                           | <b>MtoD-2</b>                                     | <b>Y</b> | <b>1</b> | <b>1</b> | <b>U</b>        | <b>RIX48945</b> | <b>2.6</b>                | <b>0.3</b> | <b>0.7</b>     | <b>0.3</b> | <b>4.0</b> | <b>1.4</b>   | <b>0.003</b>  |
| Occ                                       | <b>OccA</b>                                       | <b>Y</b> | <b>1</b> | <b>3</b> | <b>P</b>        | <b>RIX49688</b> | <b>4</b>                  | <b>0.5</b> | <b>0.7</b>     | <b>0.6</b> | <b>7.8</b> | <b>5.7</b>   | <b>0.01</b>   |
|                                           | <b>OccB</b>                                       | <b>Y</b> | <b>0</b> | <b>3</b> | <b>U</b>        | <b>RIX49689</b> | <b>41</b>                 | <b>4</b>   | <b>19</b>      | <b>2</b>   | <b>2.2</b> | <b>0.0</b>   | <b>0.03</b>   |
|                                           | OccC                                              | N        | 0        | 1        | U               | RIX49877        |                           |            |                |            |            |              |               |
|                                           | OccD                                              | N        | 0        | 3        | U               | RIX49878        |                           |            |                |            |            |              |               |
|                                           | OccE (6-NHL)                                      | N        | 1        | 0        | U               | RIX49690        | 22                        | 2.1        | 20.5           | 0.2        | 1.1        | 0.1          | 0.2           |
|                                           | OccF                                              | Y        | 2        | 4        | E               | RIX49691        | 13                        | 0.7        | 10.1           | 0.1        | 1.3        | 0.1          | 0.06          |
|                                           | <b>OccG (PPIase)</b>                              | <b>N</b> | <b>0</b> | <b>0</b> | <b>U</b>        | <b>RIX49692</b> | <b>14</b>                 | <b>1</b>   | <b>3.3</b>     | <b>0.5</b> | <b>4.2</b> | <b>0.3</b>   | <b>0.01</b>   |
|                                           | OccH                                              | N        | 0        | 0        | OM/E            | RIX49693        | 6.0                       | 0.2        | 7.7            | 0.6        | 0.8        | 0.1          | 0.10          |
|                                           | OccI                                              | N        | 1        | 3        | U               | RIX49694        | 7                         | 2.5        | 2.3            | 0.0        | 2.9        | 1.1          | 0.1           |
|                                           | <b>OccJ</b>                                       | <b>Y</b> | <b>0</b> | <b>4</b> | <b>U</b>        | <b>RIX49879</b> | <b>44</b>                 | <b>0.2</b> | <b>19</b>      | <b>3</b>   | <b>2.4</b> | <b>0.4</b>   | <b>0.03</b>   |
|                                           | <b>OccK</b>                                       | <b>N</b> | <b>0</b> | <b>0</b> | <b>C</b>        | <b>RIX49880</b> | <b>39</b>                 | <b>6</b>   | <b>13</b>      | <b>1</b>   | <b>3.0</b> | <b>0.2</b>   | <b>0.04</b>   |
|                                           | OccL                                              | N        | 1        | 3        | U               | RIX49695        |                           |            |                |            |            |              |               |
|                                           | OccM                                              | N        | 0        | 3        | U               | RIX49881        |                           |            |                |            |            |              |               |
|                                           | OccN (6 NHL)                                      | N        | 2        | 0        | U               | RIX49696        | 5.7                       | 0.3        | 6              | 1          | 0.9        | 0.1          | 0.2           |
|                                           | OccO (6 NHL)                                      | N        | 0        | 0        | U               | RIX49882        | 1.2                       | 0.8        | 4.2            | 0.4        | 0.3        | 0.2          | 0.03          |
|                                           | OccP                                              | N        | 0        | 11       | E               | RIX49697        | 14                        | 2          | 12             | 3          | 1.2        | 0.5          | 0.4           |
|                                           | OccQ                                              | Y        | 4        | 0        | IM              | RIX49698        |                           |            |                |            |            |              |               |
| OccR                                      | N                                                 | 8        | 0        | IM       | RIX49883        |                 |                           |            |                |            |            |              |               |
| OccS                                      | N                                                 | 12       | 0        | IM       | RIX49699        |                 |                           |            |                |            |            |              |               |
| Cyt c                                     | <b>Cyt c5</b>                                     | <b>N</b> | <b>1</b> | <b>1</b> | <b>U</b>        | <b>RIX47670</b> | <b>27</b>                 | <b>2</b>   | <b>9</b>       | <b>3</b>   | <b>3.2</b> | <b>0.8</b>   | <b>0.01</b>   |
|                                           | Cyt c5                                            | Y        | 1        | 2        | P               | RIX40984        | 19                        | 2          | 6              | 1          | 3.3        | 1.0          | 0.06          |
|                                           | Cyt c'/C_2                                        | Y        | 1        | 1        | P               | RIX44710        | 17                        | 5          | 3.6            | 0.8        | 4.8        | 2.3          | 0.09          |
|                                           | Cyt c'/C_2                                        | Y        | 1        | 1        | P               | RIX49630        | 7                         | 1          | 1.2            | 0.9        | 8.2        | 6.6          | 0.07          |
|                                           | Cyt c551/c552                                     | Y        | 0        | 1        | P               | RIX49087        | 13                        | 3          | 2.8            | 0.0        | 4.8        | 1.1          | 0.06          |
|                                           | Cyt c4                                            | Y        | 0        | 2        | P               | RIX48804        | 16                        | 0.8        | 9.8            | 0.8        | 1.6        | 0.2          | 0.06          |
|                                           | <b>Cyt c4</b>                                     | <b>Y</b> | <b>0</b> | <b>2</b> | <b>P</b>        | <b>RIX44782</b> | <b>4</b>                  | <b>2</b>   | <b>1.7</b>     | <b>0.7</b> | <b>2.6</b> | <b>0.1</b>   | <b>0.08</b>   |
| <b>Cyt c4</b>                             | <b>Y</b>                                          | <b>0</b> | <b>2</b> | <b>P</b> | <b>RIX45018</b> | <b>7</b>        | <b>0.6</b>                | <b>2.2</b> | <b>0.2</b>     | <b>3.0</b> | <b>0.0</b> | <b>0.02</b>  |               |
| Nap                                       | NapA                                              | Y        | 0        | 0        | P               | RIX41011        | 76                        | 2          | 67             | 3          | 1.1        | 0.1          | 0.1           |
|                                           | <b>NapB</b>                                       | <b>Y</b> | <b>1</b> | <b>2</b> | <b>P</b>        | <b>RIX41010</b> | <b>15</b>                 | <b>1</b>   | <b>5</b>       | <b>2</b>   | <b>3.2</b> | <b>0.9</b>   | <b>0.02</b>   |
|                                           | NapC                                              | N        | 1        | 4        | IM              | RIX41009        | 12                        | 3          | 13             | 1          | 1.0        | 0.2          | 0.1           |
| Nir                                       | NirS                                              | Y        | 0        | 1        | P               | RIX44719        | 58                        | 2          | 44             | 4          | 1.3        | 0.2          | 0.1           |
|                                           | NirB                                              | Y        | 1        | 2        | P               | RIX44720        | 14                        | 3          | 10             | 2          | 1.5        | 0.6          | 0.2           |
|                                           | NirC                                              | N        | 0        | 1        | P               | RIX44788        |                           |            |                |            |            |              |               |
|                                           | NirF                                              | Y        | 1        | 0        | P or C          | RIX44721        | 2                         | 1          | 7              | 1          | 0.3        | 0.1          | 0.02          |
| Nor                                       | NorC                                              | N        | 1        | 1        | IM              | RIX45182        | 3.5                       | 0.7        | 3.2            | 0.7        | 1.1        | 0.0          | 0.1           |
|                                           | NorB                                              | N        | 12       | 1        | IM              | RIX45183        |                           |            |                |            |            |              |               |
| cNos                                      | cNosZ                                             | Y        | 0        | 0        | P               | RIX42539        | 77                        | 17         | 66             | 8          | 1.2        | 0.3          | 0.2           |
|                                           | cNosC1                                            | Y        | 1        | 1        | P               | RIX42538        | 16                        | 2          | 4              | 2          | 5          | 3            | 0.08          |
|                                           | <b>cNosC2</b>                                     | <b>Y</b> | <b>1</b> | <b>2</b> | <b>P</b>        | <b>RIX42537</b> | <b>10</b>                 | <b>0.1</b> | <b>3.9</b>     | <b>0.3</b> | <b>2.6</b> | <b>0.1</b>   | <b>0.02</b>   |
|                                           | cNosB                                             | N        | 6        | 0        | IM              | RIX42536        |                           |            |                |            |            |              |               |
|                                           | cNosD                                             | N        | 0        | 0        | P               | RIX42535        |                           |            |                |            |            |              |               |
|                                           | cNosG                                             | N        | 1        | 0        | C               | RIX42534        |                           |            |                |            |            |              |               |
| cNosH                                     | N                                                 | 4        | 0        | IM       | RIX42533        |                 |                           |            |                |            |            |              |               |
| Qcr                                       | QcrA                                              | N        | 9        | 0        | CM              | RIX41976        |                           |            |                |            |            |              |               |
|                                           | QcrB                                              | N        | 9        | 0        | CM              | RIX41977        |                           |            |                |            |            |              |               |
|                                           | QcrC                                              | N        | 1        | 0        | CM              | RIX41978        |                           |            |                |            |            |              |               |
| Proteases                                 | <b>Serine protease</b>                            | <b>N</b> | <b>0</b> | <b>0</b> | <b>P</b>        | <b>RIX49468</b> | <b>27</b>                 | <b>2</b>   | <b>1.0</b>     | <b>0.3</b> | <b>29</b>  | <b>10</b>    | <b>0.02</b>   |
|                                           | <b>Carboxyl-terminal protease (S41)</b>           | <b>N</b> | <b>1</b> | <b>0</b> | <b>CM</b>       | <b>RIX48818</b> | <b>18.5</b>               | <b>0.8</b> | <b>8.0</b>     | <b>0.9</b> | <b>2.3</b> | <b>0.1</b>   | <b>0.0002</b> |
| Membrane/Extracellular                    | <b>DUF4214 protein</b>                            | <b>N</b> | <b>0</b> | <b>0</b> | <b>OM/E</b>     | <b>RIX44180</b> | <b>146</b>                | <b>25</b>  | <b>43</b>      | <b>0.6</b> | <b>3.4</b> | <b>0.5</b>   | <b>0.05</b>   |
|                                           | S-layer protein                                   | N        | 0        | 0        | U               | RIX44181        | 8                         | 0.5        | 10             | 0.6        | 0.8        | 0.1          | 0.14          |
|                                           | PEP-CTERM sorting                                 | Y        | 1        | 0        | E               | RIX45463        | 68                        | 6          | 33             | 10         | 2.1        | 0.5          | 0.03          |
|                                           | Tol-Pal system protein TolB                       | Y        | 0        | 0        | P               | RIX44015        | 20                        | 2          | 12             | 1          | 1.67       | 0.05         | 0.03          |
|                                           | <b>Peptidoglycan-associated lipoprotein (Pal)</b> | <b>N</b> | <b>0</b> | <b>0</b> | <b>OM</b>       | <b>RIX44016</b> | <b>27.3</b>               | <b>0.2</b> | <b>10</b>      | <b>3</b>   | <b>3</b>   | <b>1</b>     | <b>0.04</b>   |
|                                           | Tol-Pal system protein YbgF                       | Y        | 0        | 0        | U               | RIX44017        | 10.8                      | 0.4        | 4              | 2          | 4          | 2            | 0.06          |
| <b>Pilus assembly protein</b>             | <b>N</b>                                          | <b>0</b> | <b>0</b> | <b>U</b> | <b>RIX46961</b> | <b>54</b>       | <b>5</b>                  | <b>30</b>  | <b>5</b>       | <b>1.8</b> | <b>0.1</b> | <b>0.001</b> |               |
| Other                                     | <b>PQQ-dependent dehydrogenase</b>                | <b>Y</b> | <b>0</b> | <b>0</b> | <b>P</b>        | <b>RIX45050</b> | <b>37</b>                 | <b>4</b>   | <b>17</b>      | <b>1</b>   | <b>2.2</b> | <b>0.1</b>   | <b>0.03</b>   |
|                                           | Phasin family granule-associated protein          | N        | 0        | 0        | U               | RIX40682        | 49                        | 2          | 22             | 1          | 2.2        | 0.2          | 0.03          |
|                                           | Phasin family granule-associated protein          | Y        | 0        | 0        | U               | RIX40683        | 34                        | 4          | 16             | 1          | 2.1        | 0.0          | 0.03          |
|                                           | High potential iron-sulfur protein                | Y        | 0        | 0        | U               | RIX49681        | 10.79                     | 0.01       | 6.5            | 0.4        | 1.7        | 0.1          | 0.02          |
|                                           | Electron transfer flavoprotein (FixA)             | N        | 0        | 0        | C               | RIX43544        | 16                        | 3          | 10             | 2          | 1.7        | 0.0          | 0.04          |
| <b><i>Ca. Geobacter occultata</i></b>     |                                                   |          |          |          |                 |                 |                           |            |                |            |            |              |               |
| E-pilus                                   | <b>Type IV pilin PilA</b>                         | <b>N</b> | <b>1</b> | <b>0</b> | <b>E</b>        | <b>RNC67631</b> | <b>93</b>                 | <b>3</b>   | <b>18</b>      | <b>3</b>   | <b>5</b>   | <b>1</b>     | <b>0.02</b>   |
